1 Article

2 **Neutralizing effects of small molecule inhibitors and**  
3 **metal chelators on coagulopathic *Viperinae* snake**  
4 **venom toxins**

5 Received: date; Accepted: date; Published: date

6 **Abstract:** Animal-derived antivenoms are the only specific therapies currently available for the  
7 treatment of snake envenoming, but these products have a number of limitations associated with  
8 their efficacy, safety and affordability for use in tropical snakebite victims. Small molecule drugs  
9 and drug candidates are regarded as promising alternatives for filling the critical therapeutic gap  
10 between snake envenoming and effective treatment. In this study, by using an advanced analytical  
11 technique that combines chromatography, mass spectrometry and bioassaying, we investigated the  
12 effect of several small molecule inhibitors that target phospholipase A<sub>2</sub> (varespladib) and snake  
13 venom metalloproteinase (marimastat, dimercaprol and DMPS) toxin families on inhibiting the  
14 activities of coagulopathic toxins found in *Viperinae* snake venoms. The venoms of *Echis carinatus*,  
15 *Echis ocellatus*, *Daboia russelii* and *Bitis arietans*, which are known for their potent coagulopathic  
16 toxicities, were fractionated in high resolution onto 384-well plates using liquid chromatography  
17 followed by coagulopathic bioassaying of the obtained fractions. Bioassay activities were correlated  
18 to parallel recorded mass spectrometric and proteomics data to assign the venom toxins  
19 responsible for coagulopathic activity and assess which of these toxins could be neutralized by the  
20 inhibitors under investigation. Our results showed that the phospholipase A<sub>2</sub>-inhibitor varespladib  
21 neutralized the vast majority of anticoagulation activities found across all of the tested snake  
22 venoms. Of the snake venom metalloproteinase inhibitors, marimastat demonstrated impressive  
23 neutralization of the procoagulation activities detected in all of the tested venoms, whereas  
24 dimercaprol and DMPS could only partially neutralize these activities at the doses tested. Our  
25 results provide additional support for the concept that combination of small molecules,  
26 particularly the combination of varespladib with marimastat, serve as a drug-repurposing  
27 opportunity to develop new broad-spectrum inhibitor-based therapies for snakebite envenoming.

28 **Keywords:** snakebite treatment candidates; marimastat; varespladib; dimercaprol; DMPS;  
29 nanofractionation

---

31 **1. Introduction**

32 Bites by venomous cause 81,000 - 138,000 deaths per annum, with the majority occurring in the  
33 rural resource-poor regions of the tropics and sub-tropics [1]. The venomous snakes responsible for  
34 the vast majority of severe envenomings are members of the *Viperidae* and *Elapidae* families [2,3].  
35 Elapid snakes have venoms that are highly abundant in neurotoxins that disable muscle contraction  
36 and cause neuromuscular paralysis [1,4]. Contrastingly, viper venoms typically contain numerous  
37 proteins that disrupt the functioning of the coagulation cascade, the hemostatic system, and tissue  
38 integrity [4,5]. Envenomings caused by these snakes can cause prominent local effects including  
39 necrosis, hemorrhage, edema and pain, and often result in permanent disabilities in survivors [6,7].  
40 One of the most common but serious pathological effects of systemic viper envenoming is  
41 coagulopathy, which renders snakebite victims vulnerable to suffering lethal internal hemorrhages  
42 [8]. Venom induced coagulopathy presenting following bites by viperid snakes is thought to  
43 predominately be caused by venom enzymes such as phospholipase A<sub>2</sub>s (PLA<sub>2</sub>s), snake venom  
44 serine proteinases (SVSPs), and snake venom metalloproteinases (SVMPs) [9-11]. PLA<sub>2</sub>s can prevent

45 blood clotting and induce anticoagulation by hydrolyzing phospholipids [12]. SVSPs can  
46 proteolytically degrade fibrinogen and can release bradykinins from plasma kininogens [13,14].  
47 SVMPs work on various clotting factors and can degrade capillary basement membranes, thereby  
48 increasing vascular permeability and cause leakage [10,15,16]. These toxins can work synergistically  
49 causing local and systemic hemorrhage and coagulopathy.

50 The only specific therapies currently available for treating snake envenoming are  
51 animal-derived antivenoms. Consisting of immunoglobulins purified from hyperimmunized ovine  
52 or equine plasma/serum, these products save thousands of lives each year, but are associated with a  
53 number of therapeutics challenges, including limited cross-snake species efficacies, poor safety  
54 profiles and, for many snakebite victims residing in remote rural areas in developing countries,  
55 unacceptable issues with affordability and accessibility [17]. Small molecule toxin inhibitors are  
56 regarded as promising candidates for treating snakebite as they can seemingly generically block the  
57 enzymatic activities of venoms [18-20]. Varespladib, an indole-based nonspecific pan-secretory  
58 PLA<sub>2</sub> inhibitor has been studied extensively for repurposing for snakebite. Having originally been  
59 investigated in Phase II and III clinical trials for treating septic shock, coronary heart disease and  
60 sickle cell disease-induced acute chest syndrome [21,22], varespladib has since been shown to be  
61 highly potent in suppressing venom-induced PLA<sub>2</sub> activity both *in vitro* and *in vivo* in murine models  
62 [23]. Varespladib shows great promise against neurotoxic elapid snake venoms and has been shown  
63 to prevent lethality in murine *in vivo* models of envenoming [24] but is seemingly capable of also  
64 inhibiting certain myotoxic and coagulotoxic symptoms induced by snake venoms [25,26].

65 A number of other small molecules have shown promise for repurposing to inhibit SVMP  
66 venom toxins. Marimastat is a broad spectrum matrix metalloprotease inhibitor that functions by  
67 binding to the active site of matrix metalloproteinases where it coordinates the metal ion in the  
68 binding pocket [27,28]. As a water-soluble orally bioavailable matrix metalloproteinase inhibitor  
69 [29,30], marimastat reached phase II and III clinical trials for multiple solid tumor types [31-33],  
70 including pancreatic, lung, breast, colorectal, brain, and prostate cancer [34-36]. SVMPs are toxins  
71 which structurally and functionally are homologous to matrix metalloproteinases [37-39]. Like other  
72 compounds in this class of drugs (e.g. batimastat [40]), marimastat is a promising drug candidate for  
73 treating snakebite due to its inhibitory capabilities against SVMP toxins [41,42]. Dimercaprol, a  
74 historical drug approved by the World Health Organization (WHO) for treatment of heavy metal  
75 poisoning [43], contains two metal-chelating thiol groups and has long been used against arsenic,  
76 mercury, gold, lead and antimony intoxication [44-46]. It also represents a treatment option for  
77 Wilson's disease in which the body retains copper. Moreover, it has been studied as a candidate for  
78 acrolein detoxification as it can effectively reduce the acrolein concentration *in vivo* in murine  
79 because of its ability to bind to both the carbon double bond and aldehyde group of acrolein. The  
80 water-soluble, tissue-permeable and licensed metal chelator, 2,3-dimercaptopropane-1-sulfonic acid  
81 (DMPS), is also suitable for treating acute and chronic heavy metal intoxication including lead,  
82 mercury, cadmium and copper [47,48]. It was recently shown that both dimercaprol and DMPS  
83 displayed potential for repurposing as small molecule chelators to treat snake envenoming [20],  
84 most probably by chelating and removing Zn<sup>2+</sup> from the active site of Zn<sup>2+</sup>-dependent SVMPs. Of the  
85 two drugs, DMPS showed highly promising preclinical efficacy when used as an early oral  
86 intervention after envenoming by the SVMP-rich venom of the West African saw-scaled viper (*Echis*  
87 *ocellatus*), prior to later antivenom treatment with antivenom [20]. Thus, marimastat, dimercaprol  
88 and DMPS all represent promising candidates for drug repurposing as snakebite therapeutics, as  
89 they either inhibit SVMPs or chelate the Zn<sup>2+</sup> ion required for SVMP catalysis.

90 In this paper, the coagulopathic properties of various snakes from the viper subfamily *Viperinae*  
91 (*Echis carinatus*, *E. ocellatus*, *Daboia russelii* and *Bitis arietans*) were evaluated using nanofractionation  
92 analytics in combination with a high-throughput coagulation assay, before the inhibitory capabilities  
93 of varespladib, marimastat, dimercaprol and DMPS against the coagulopathic toxicities of the  
94 resulting snake venom fractions were investigated. To this end, bioactivity chromatograms were  
95 acquired after fractionation, and parallel obtained mass spectrometry (MS) and proteomics data  
96 were used to correlate observed bioactivity with the identity of the venom toxins responsible for the

97 observed enzymatic effects. Thus, we assessed the ability of varespladib, marimastat, dimercaprol  
98 and DMPS to neutralize the coagulopathic venom components. The results indicated that  
99 varespladib in combination with heavy metal chelators and/or broad-spectrum protease inhibitors  
100 could be viable first line therapeutic candidates for initial and adjunct treatment of coagulopathic  
101 snakebite envenoming.

## 102 2. Experimental

### 103 2.1 Chemicals

104 Water from a Milli-Q Plus system (Millipore, Amsterdam, The Netherlands) was used.  
105 Acetonitrile (ACN) and formic acid (FA) were supplied by Biosolve (Valkenswaard, The  
106 Netherlands). Calcium chloride (CaCl<sub>2</sub>, dehydrate, ≥ 99%) was from Sigma-Aldrich (Zwijndrecht,  
107 The Netherlands) and was used to de-citrate plasma to initiate coagulation in the coagulation assay.  
108 Phosphate buffered saline (PBS) was prepared by dissolving PBS tablets (Sigma-Aldrich) in water  
109 according to the manufacturer's instructions and was stored at −4 °C for no longer than one week  
110 prior to use. Sodium citrated bovine plasma was obtained from Biowest (Nuaillé, France) as sterile  
111 filtered. The plasma (500 ml bottle) was defrosted in a warm water bath, and then quickly  
112 transferred to 15 ml CentriStar™ tubes (Corning Science, Reynosa, Mexico). These 15 ml tubes were  
113 then immediately re-frozen at −80 °C, where they were stored until use. Venoms were sourced from  
114 either wild-caught specimen maintained in or historical venom samples stored in the Herpetarium  
115 of the Liverpool School of Tropical Medicine. This facility and its protocols for the expert husbandry  
116 of snakes are approved and inspected by the UK Home Office and the LSTM and University of  
117 Liverpool Animal Welfare and Ethical Review Boards. The venom pools were from vipers with  
118 diverse geographical localities, namely: *B. arietans* (Nigeria), *D. russelii* (Sri Lanka), *E. carinatus*  
119 (India) and *E. ocellatus* (Nigeria). Note that the Indian *E. carinatus* venom was collected from a single  
120 specimen that was inadvertently imported to the UK via a boat shipment of stone, and then  
121 rehoused at LSTM on the request of the UK Royal Society for the Prevention of Cruelty to Animals  
122 (RSPCA). Venom solutions were prepared by dissolving lyophilized venoms into water to a  
123 concentration of 5.0 ± 0.1 mg/ml and were stored at −80 °C until use. The compounds varespladib  
124 (A-001), marimastat ((2S,3R)-N4-[(1S)-2,2-Dimethyl-1-[(methylamino)carbonyl]  
125 propyl]-N1,2-dihydroxy-3-(2-methylpropyl) butanedia- mide), dimercaprol  
126 (2,3-Dimercapto-1-propanol) and DMPS (2,3-dimercapto-1-propane-sulfonic acid sodium salt  
127 monohydrate) were purchased from Sigma-Aldrich. They were dissolved in DMSO (≥ 99.9%,  
128 Sigma-Aldrich) to a concentration of 10 mM and stored at −20 °C. Prior to use, these four compounds  
129 were diluted in PBS buffer to the described concentrations.

### 130 2.2 Venom nanofractionation

131 All venoms were nanofractionated onto transparent 384-well plates (F-bottom, rounded square  
132 well, polystyrene, without lid, clear, non-sterile; Greiner Bio One, Alphen aan den Rijn, The  
133 Netherlands) using a Shimadzu UPLC chromatography system ('s Hertogenbosch, The  
134 Netherlands). The UPLC system was connected post-column to a modified Gilson 235P autosampler  
135 programmed for nanofractionation, which was controlled by the in-house written software Ariadne,  
136 or was post-column connected to a commercially available FractioMate™ nanofractionator  
137 (SPARK-Holland & VU, Netherlands, Emmen & Amsterdam) controlled by FractioMator software.  
138 The UPLC system was equipped with two Shimadzu LC-30AD parallel pumps, a Shimadzu  
139 SIL-30AC autosampler, a Shimadzu CTO-30A column oven, a Shimadzu SPD-M20A Prominence  
140 diode array detector and a DGU-20A5R Prominence degassing unit. All elements were remote  
141 controlled by the Shimadzu Lab Solutions software assisted by a Shimadzu CBM-20A System  
142 Controller. Venom solutions (5.0 ± 0.1 mg/ml) diluted in water to a concentration of 1.0 mg/ml were  
143 injected (50 µl) for nanofractionation after gradient liquid chromatography (LC). A Waters XBridge  
144 reverse-phase C18 column (250 × 4.6 mm with 3.5-µm pore-size particles) and a Shimadzu CTO-30A  
145 column oven maintained at 30 °C were used for LC separations. The total eluent flow rate was 0.5

146 ml/min and was controlled by the two Shimadzu LC-30AD parallel pumps. The gradient separation  
147 was carried out by linearly increasing mobile phase B from 0 to 50% during the first 20 min, from  
148 50% to 90% during the following 4 min, and was then kept at 90% for 5 min. Subsequently, mobile  
149 phase B was decreased from 90 to 0% in 1 min and kept at 0% for 10 min. Mobile phases A consisted  
150 of 98% H<sub>2</sub>O, 2% ACN and 0.1% FA, while mobile phase B consisted of 98% ACN, 2% H<sub>2</sub>O and 0.1%  
151 FA. A 9:1 (v/v) split of the column effluent was applied, of which the smaller fraction was sent to the  
152 UV detector followed by MS, and the larger fraction was directed to the nanofraction collector. The  
153 nanofractionator was set to continuously collect fractions of 6 s/well. After fraction collection, the  
154 transparent 384-well plates were freeze-dried overnight using a Christ Rotational Vacuum  
155 Concentrator (RVC 2-33 CD plus, Zalm en Kipp, Breukelen, The Netherlands) equipped with a  
156 cooling trap operated at -80 °C. The freeze-dried plates were stored at -20 °C until the bioassays  
157 were performed.

### 158 2.3 Plasma coagulation activity assay

159 The HTS plasma coagulation assay used in this study was developed by Still *et al.* [49]. CaCl<sub>2</sub>  
160 was dissolved in water to a concentration of 20 mM at room temperature. A 15 ml CentriStar™ tube  
161 with frozen plasma was defrosted to room temperature in a warm water bath and then centrifuged  
162 at 2000 rpm (805 × g) for 4 min to remove potential particulate matter. Stock solutions (10 mM) of the  
163 compounds under investigation (i.e. varespladib, marimastat, dimercaprol and DMPS) were diluted  
164 in PBS buffer to the required concentrations. Of these diluted solutions, 10 µl were pipetted into all  
165 plate wells containing freeze-dried venom fractions by using a VWR Multichannel Electronic Pipet  
166 (10 µl of PBS were used for venom-only analyses as a control). Next, plates were centrifuged for 1  
167 min at 2000 rpm (805 × g) in a 5810 R centrifuge (Eppendorf, Germany) and then pre-incubated for  
168 30 min at room temperature. The final concentrations of the inhibitor solutions used in the  
169 coagulation bioassay were 20 µM, 4 µM and 0.8 µM, and in some cases 0.16 µM, 0.032 µM and 0.0064  
170 µM.

171 Following incubation, 20 µl of the CaCl<sub>2</sub> solution was pipetted into each well of a 384-well plate  
172 with vacuum-centrifuged (to dryness) venom fractions, followed by 20 µl of centrifuged plasma  
173 using a Multidrop™ 384 Reagent Dispenser (Thermo Fisher Scientific, Ermelo, The Netherlands)  
174 after in-between rinsing the Multidrop with Milli-Q. Immediately after plasma addition, the plate  
175 was placed in a Varioskan™ Flash Multimode Reader (Thermo Fisher Scientific, Ermelo, The  
176 Netherlands) and a kinetic absorbance measurement was performed at a wavelength of 595 nm at  
177 room temperature for 100 min. All analyses were performed at least in duplicate. The slope of the  
178 signal obtained for each well was normalized by dividing the slope to the median of all the slope  
179 signals from all wells in that measurement. The coagulation curves were plotted versus the  
180 chromatographic retention time for each fraction collected in three different ways (very fast  
181 coagulation activity, slightly/medium increased coagulation activity and anticoagulation activity) to  
182 fully depict both the procoagulation and anticoagulation activities in each well. Detailed  
183 explanations on the rationale of processing and plotting the data in this way is provided by  
184 Slagboom *et al.* and Xie *et al.* [50,51], and can be found in the Supporting Information (Section S1).

### 185 2.4 Correlation of biological data with MS data

186 The corresponding accurate mass(es) and proteomics data for each venom fraction in this study  
187 have already been acquired by Slagboom *et al.* [51] and as such were correlated with the bioactivity  
188 chromatograms obtained in the current study. For venoms under study in this research that were not  
189 studied by Slagboom *et al.* [51], the same procedure as described by Slagboom *et al.* [51] was followed  
190 to acquire and process proteomics data on these snake venoms. The UniprotKB database was used  
191 to determine the toxin class and any known functions for the relevant toxins thought to be responsible  
192 for the observed coagulopathic toxicities. For LC separations performed at different times and in  
193 different labs, the retention times of eluting snake venom toxins may differ slightly. The LC-UV  
194 chromatograms (measured at 220 nm, 254 nm, and 280 nm), which provided characteristic  
195 fingerprint profiles for each venom fraction, were used to negotiate these retention time shifts. By

196 using the LC-UV data, the chromatographic bioassay data from this study was correlated with the  
197 MS total-ion currents (TICs), extracted-ion chromatograms (XICs), and proteomics data obtained by  
198 Slagboom *et al.* [51]. In order to construct useful XICs, MS spectra were extracted from the time  
199 frames that correlated with regions in the chromatograms for each bioactive peak. Then, for all *m/z*  
200 values showing a significant signal observed in the mass spectra, XICs were plotted. In turn, these  
201 XICs were used for matching with peak retention times of bioactive compounds in the  
202 chromatograms. The exact masses matching the bioactives were tentatively assigned based on  
203 matching peak shape and correlation with retention times in bioassay traces. More specifically, the  
204 *m/z*-values in the MS data were correlated to each bioactive peak using the accurate monoisotopic  
205 masses determined by applying the deconvolution option in the MS software. For the proteomics  
206 data, in-well tryptic digestions were performed by Slagboom *et al.* [51] on snake venom fractions.  
207 These proteomics results could directly be correlated to coagulopathic activity that was indicated by  
208 the bioassay chromatograms.

### 209 3. Results

210 In this study, a nanofractionation approach was used to evaluate the inhibitory effects of  
211 varespladib, marimastat, dimercaprol and DMPS on the coagulopathic properties of venom toxins  
212 fractionated from a variety of *Viperinae* snake species. A recently developed low-volume HTS  
213 coagulation bioassay was used to assess the coagulation activities of LC-fractionated venoms in a  
214 384-well plate format. These coagulopathic activities were correlated to parallel obtained MS and  
215 proteomics data to determine which specific venom toxins were neutralized by the potential  
216 inhibitors. All analyses were performed at least in duplicate using venom concentrations of 1.0  
217 mg/ml.

#### 218 3.1 Inhibitory effects of varespladib, marimastat, dimercaprol and DMPS on *Echis* venoms

219 Various geographically distinct saw-scaled viper venoms (genus *Echis*) were investigated in this  
220 study, specifically from the Indian species *E. carinatus* and the west African species *E. ocellatus*. The  
221 inhibitory effects of varespladib, marimastat, dimercaprol and DMPS against the coagulopathic  
222 activities observed for LC fractions of both venoms were investigated in a concentration-dependent  
223 fashion (Figures 1-2). Duplicate bioassay chromatograms together with a detailed description of  
224 each coagulopathic peak observed are presented in the Supporting Information (Section S1).

225 Figure 1 shows the bioassay chromatograms of nanofractionated venom toxins from *E. carinatus*  
226 in the presence of different concentrations of varespladib, marimastat, dimercaprol and DMPS. In  
227 the venom-only analysis, potent procoagulation activities were observed in the very fast coagulation  
228 chromatogram (22.0-22.9 min) and the slightly/medium increased coagulation chromatogram  
229 (21.2-23.1 min and/or 19.9-21.2 min), while anticoagulation activities were observed in the  
230 anticoagulation chromatogram (19.1-19.9 min). Interestingly, the PLA<sub>2</sub>-inhibitor varespladib  
231 inhibited both the anticoagulation and procoagulation activities, with the exception of one major  
232 peak observed in the slightly/medium increased coagulation chromatogram. In contrast,  
233 marimastat, dimercaprol and DMPS only exerted inhibitory effects on the procoagulation activities  
234 of *E. carinatus* venom. The anticoagulation activity of *E. carinatus* venom was fully inhibited by  
235 varespladib at a 20  $\mu$ M concentration, while the very fast procoagulation activity was fully inhibited  
236 by varespladib, dimercaprol and DMPS at a concentration of 4  $\mu$ M. Marimastat superseded the other  
237 small molecules by fully inhibiting the very fast procoagulation activity at a concentration of 0.16  
238  $\mu$ M. The slightly/medium increased coagulation activity was fully inhibited by 0.8  $\mu$ M marimastat,  
239 but a sharp positive peak (21.7-22.2 min) was still retained following incubation with 20  $\mu$ M  
240 varespladib. Dimercaprol only inhibited the front peak (21.3-22.1 min) present in the  
241 slightly/medium increased coagulation activity chromatogram, while DMPS inhibited mostly the  
242 tailing part (22.2-23.1 min) of this peak at its highest concentration tested (20  $\mu$ M). Overall, DMPS  
243 was found to be more effective than dimercaprol in abrogating the procoagulation toxicities of *E.*  
244 *carinatus* venom. These findings demonstrate that the tested inhibitors have different specificities,

245 but that marimastat most effectively inhibits procoagulant components and varespladib  
246 anticoagulant components of *E. carinatus* venom.

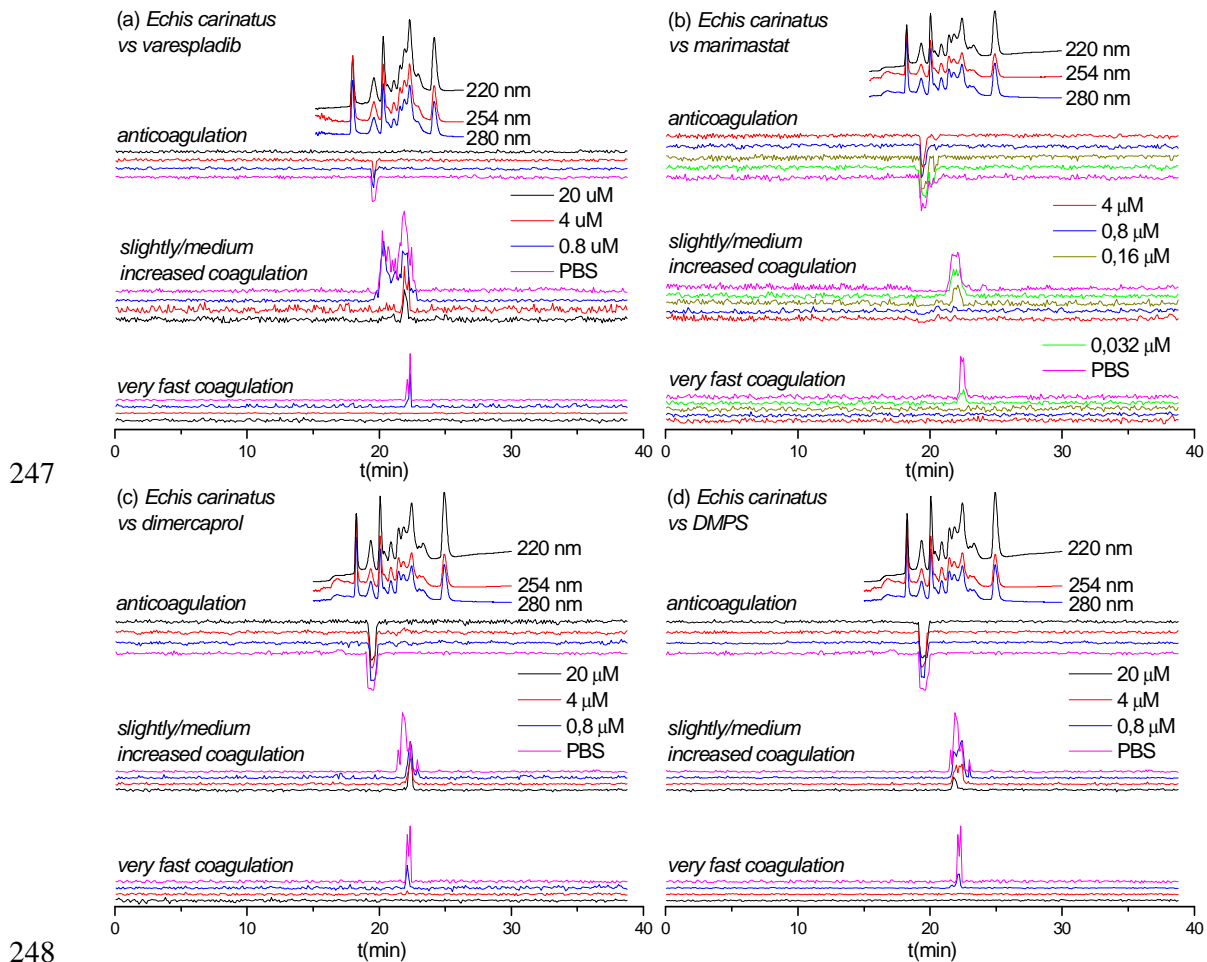

**Figure 1.** UV absorbance chromatograms and reconstructed coagulopathic toxicity chromatograms of nanofractionated venom toxins from *E. carinatus* venom in the presence of different concentrations of (a) varespladib, (b) marimastat, (c) dimercaprol and (d) DMPS.

252 Figure 2 shows the bioassay chromatograms for nanofractionated toxins from *E. ocellatus* venom  
253 in the presence of different concentrations of varespladib, marimastat, dimercaprol and DMPS. In  
254 the venom-only analysis, we observed similar results to those obtained for *E. carinatus* venom;  
255 multiple co-eluting sharp peaks were present in the very fast coagulation chromatogram (25.1-26.2  
256 min), the slightly/medium increased coagulation chromatogram (25.1-27.1 min) and the  
257 anticoagulation chromatogram (23.4-24.4 min). All peaks decreased in height and width with  
258 increasing varespladib concentrations. The potent negative peak (23.4-24.4 min) in the  
259 anticoagulation chromatograms was fully inhibited by 4  $\mu\text{M}$  varespladib and the later eluting  
260 weakly negative peak (25.9 min) by 20  $\mu\text{M}$  varespladib. While full inhibition of anticoagulation  
261 activities was achieved, the procoagulation activities were not fully inactivated at the highest  
262 varespladib concentration tested (20  $\mu\text{M}$ ). However, both the very fast coagulation activity and the  
263 slightly/medium increased coagulation activity were also somewhat reduced by varespladib in a  
264 concentration-dependent fashion. Similar findings, whereby both very fast and slightly/medium  
265 increased coagulation were reduced in a concentration dependent manner but not fully abrogated,  
266 were also observed for dimercaprol, although this inhibitor had no effect on anticoagulant venom  
267 activities. Marimastat and DMPS also had no effect on anticoagulant venom activity, but effectively  
268 inhibited the procoagulant actions of *E. ocellatus* venom. Very fast procoagulation activity was fully

269 inhibited at a lower concentration of marimastat (0.16  $\mu\text{M}$ ) than DMPS (20  $\mu\text{M}$ ), while  
270 slightly/medium increased coagulation activity was fully inhibited by 4  $\mu\text{M}$  marimastat compared  
271 with almost complete inhibition observed when using 20  $\mu\text{M}$  DMPS. Thus, similar to findings with  
272 *E. carinatus*, marimastat exhibited superior inhibition of procoagulant venom activities, while  
273 varespladib was the only inhibitor capable of abrogating anticoagulant venom effects.

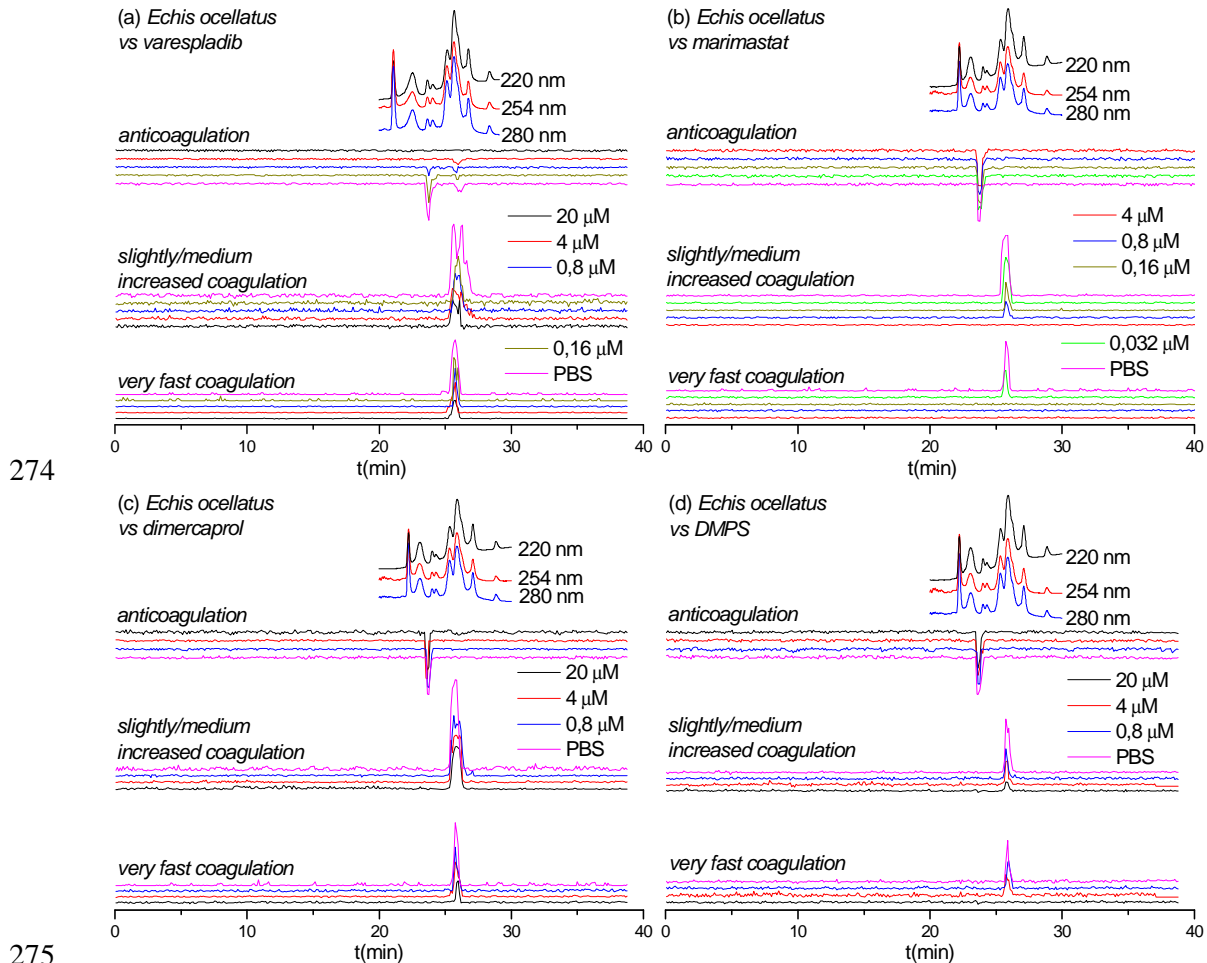

276 **Figure 2.** UV absorbance chromatograms reconstructed coagulopathic toxicity chromatograms of  
277 nanofractionated venom toxins from *E. ocellatus* venom in the presence of different concentrations of  
278 (a) varespladib, (b) marimastat, (c) dimercaprol and (d) DMPS.

### 279 3.2 Inhibitory effect of varespladib, marimastat, dimercaprol and DMPS on *Daboia russelii* venom

280 Next, we assessed the inhibitory capability of the same small molecule toxin inhibitors on a  
281 *Viperinae* snake from a different genus – the Russell's viper (*Daboia russelii*), which is highly  
282 medically-important species found in south Asia [52-54]. The inhibitory effects of varespladib,  
283 marimastat, dimercaprol and DMPS on the venom of *D. russelii* are shown in Figure 3. Duplicate  
284 bioassay chromatograms for the *D. russelii* venom analyses can be found in the Supporting  
285 Information in Section 2. For the venom-only analysis, a strong positive peak was observed for both  
286 the very fast coagulation activity (21.5-22.4 min) and for the slightly/medium increased coagulation  
287 activity (21.5-22.8 min). A very broad and strong negative activity peak (18.6-21.5 min) was also  
288 observed, demonstrating potent anticoagulation activity. In terms of procoagulant venom effects,  
289 both very fast and slightly/medium increased coagulation activities decreased dose-dependently in  
290 the presence of varespladib, marimastat and dimercaprol, although neither varespladib nor  
291 dimercaprol could fully neutralize these activities. However, in line with the earlier findings for

292 *Echis* spp, full neutralization of both types of procoagulation were observed with marimastat, at 0.8  
293  $\mu\text{M}$  for very fast coagulation activity and at 4  $\mu\text{M}$  for slightly/medium increased coagulation  
294 activity. As anticipated, and again in line with findings observed with *Echis* spp., neither of the  
295 SVMMP-inhibitors (marimastat and dimercaprol) abrogated anticoagulant venom activity. In contrast,  
296 varespladib showed potent inhibition of anticoagulation, as the broad and potent negative peak  
297 (18.6-21.5 min) decreased to only a very minor negative peak (19.5-20.2 min; 20  $\mu\text{M}$  varespladib)  
298 with increasing varespladib concentrations. DMPS showed no inhibition on both the procoagulant  
299 and anticoagulant venom activities at tested concentrations of 20  $\mu\text{M}$  and 4  $\mu\text{M}$  on *D. russelii* venom  
300 (Figure 3 (d)).

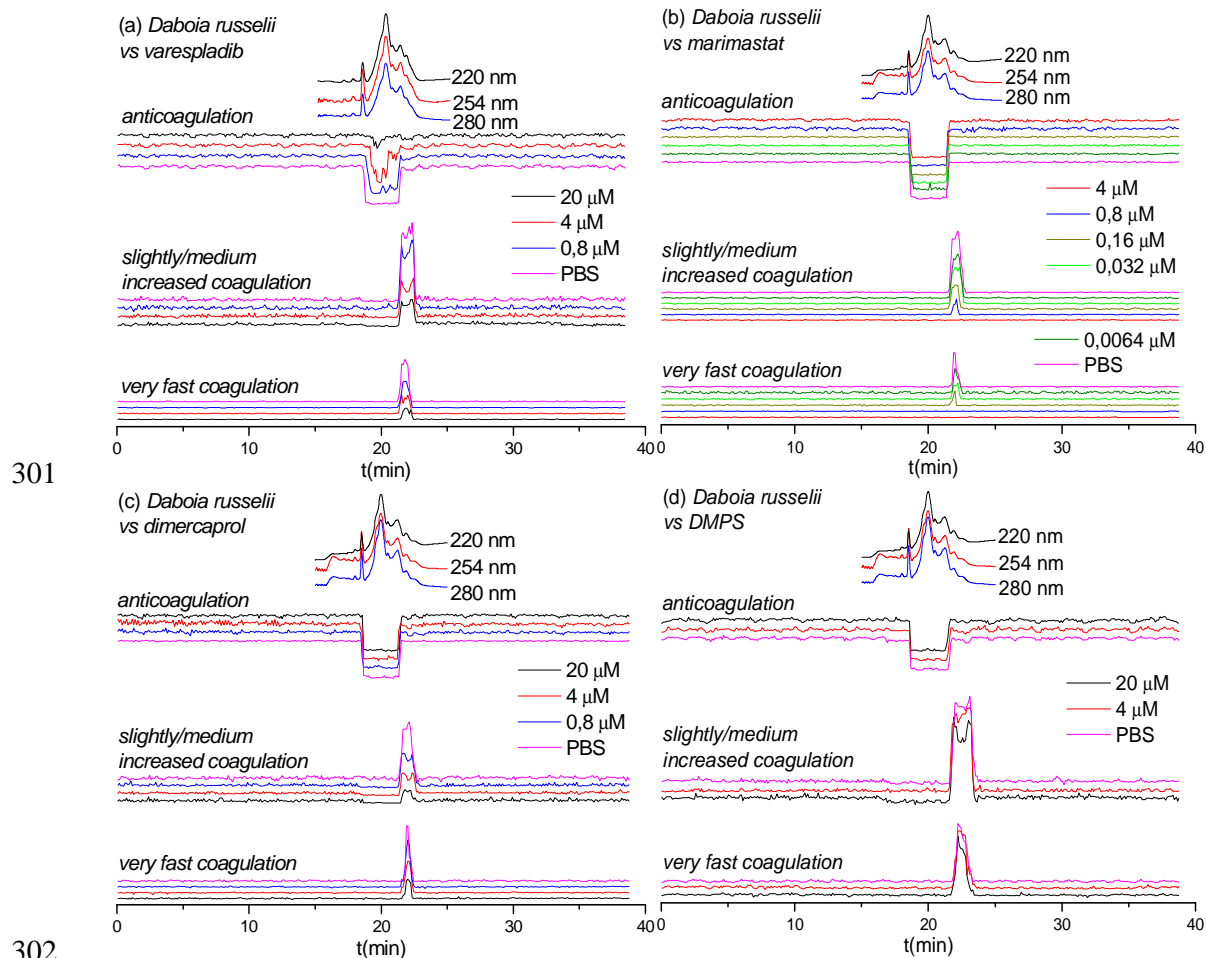

**Figure 3.** UV absorbance chromatograms and reconstructed coagulopathic toxicity chromatograms of nanofractionated venom toxins from *D. russelii* venom in the presence of different concentrations of (a) varespladib, (b) marimastat, (c) dimercaprol and (d) DMPS.



### 307 3.3 Inhibitory effects of varespladib and marimastat on *Bitis arietans* venom

308 The inhibitory effects of varespladib and marimastat on the coagulopathic properties of venom  
309 of the puff adder (*B. arietans*) which is found widely distributed across sub-Saharan Africa and parts  
310 of the Middle East, are shown in Figure 4. Duplicate bioassay chromatograms for the *B. arietans*  
311 venom analyses are shown in the Supporting Information in Section 3. In the venom-only analyses,  
312 anticoagulation activity was observed as two sharp negative peaks in the bioactivity chromatograms  
313 (16.2–16.7 min and 16.7–17.1 min), however no procoagulation activity was detected, which is  
314 consistent with previous findings using this venom [55]. Consequently, of the three SVMP-inhibitors  
315 used elsewhere in this study, we only selected marimastat for assessment of toxin inhibition as a  
316 control for the PLA<sub>2</sub>-inhibitor varespladib. In line with findings from the other *Viperinae* species  
317 under study, increasing concentrations of varespladib resulted in full inhibition of the two negative  
318 anticoagulation peaks, at concentrations of 0.16  $\mu\text{M}$  and 0.8  $\mu\text{M}$ , respectively. Conversely, and also  
319 in line with our earlier findings, no inhibitory effects were observed with marimastat, even at  
320 concentrations of 20  $\mu\text{M}$ .

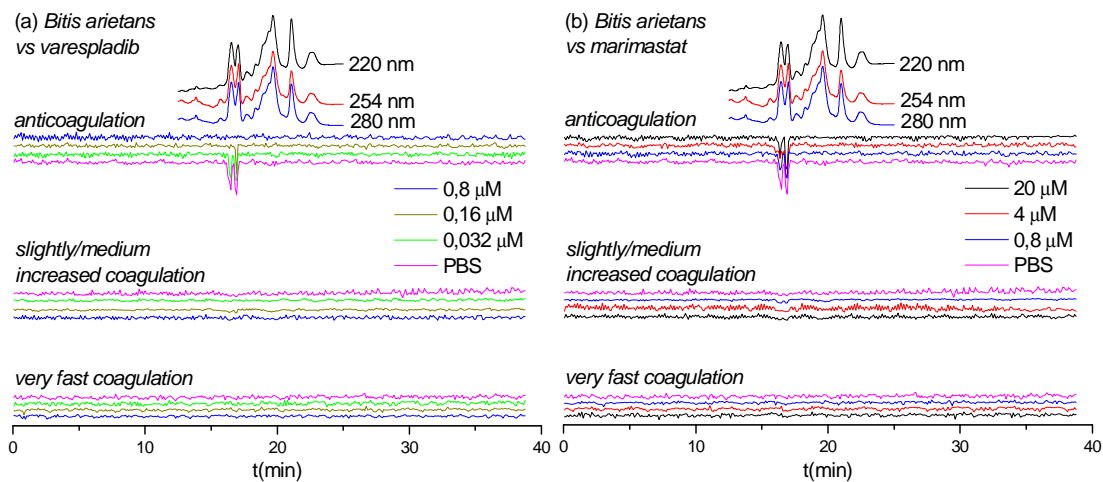

321

322 **Figure 4.** UV absorbance chromatograms and reconstructed coagulopathic toxicity chromatograms  
323 of nanofractionated venom toxins from *B. arietans* venom in the presence of different concentrations  
324 of (a) varespladib and (b) marimastat.

### 325 3.4 Identification of coagulopathic venom toxins neutralized by varespladib, marimastat, dimercaprol and 326 DMPS

327 MS and proteomics data previously obtained by Slagboom *et al.* [51] was used to assign the  
328 venom toxins responsible for the observed coagulation activities are listed in Table 1. All tentatively  
329 identified anticoagulant PLA<sub>2</sub>s are provided in Table 1, including those found in our study not  
330 previously described as possessing anticoagulant properties in the UniprotKB database. For those  
331 toxins for which no exact mass data could be acquired by LC-MS, only the proteomics mass data  
332 retrieved from Mascot searches are presented.

333 Based on results from Figures 1–4 and Table 1, the inhibitory effects of varespladib, marimastat,  
334 dimercaprol and DMPS on individual *Viperinae* venom toxins were assessed. PLA<sub>2</sub> toxins were  
335 identified as components responsible for anticoagulation in all species studied, except for *B. arietans*,  
336 for which CTLs were identified. All these identified anticoagulant toxins were fully abrogated by  
337 varespladib at various concentrations, as indicated in Table 1. The CTLs identified for *B. arietans*  
338 venom highly likely co-eluted with anticoagulants. However, no other anticoagulants were  
339 identified from this venom. No procoagulant toxins could be identified for the procoagulant peaks  
340 from the Mascot results for *E. carinatus*, *D. russelii* and *B. arietans* venoms. The procoagulants  
341 identified for *E. ocellatus* venom were both SVMPs and CTLs. All these toxins could be fully  
342 abrogated by marimastat at 0.16  $\mu\text{M}$  or by DMPS at 20  $\mu\text{M}$ . The procoagulant activity detected for *E.*

343 *carinatus* and *D. russelii* venoms could be fully inhibited by marimastat at low concentrations. It was  
 344 reasonable to speculate that the procoagulant toxins responsible for these activities were mainly  
 345 SVMPPs. In the cases where multiple toxins elute closely, unambiguously assigning single toxins to  
 346 each detected bioactivity is difficult. For bioactive compounds that eluted in activity peaks which  
 347 were only partly inhibited, it was difficult to critically determine which of them was abrogated. This  
 348 would require further improving LC separations under toxin non-denaturing and MS compatible  
 349 eluent conditions. As critical note it has to be mentioned that despite venom toxins generally are  
 350 rather stable, during chromatography within the nanofractionation analytics pipeline some venom  
 351 toxins might have (partly) denatured and thereby lost their activity. A detailed description of the  
 352 results discussed here is provided in the Supporting Information in Section S4.

353 **Table 1.** Correlated MS and proteomics data for associated coagulopathic venom toxins. (Peak  
 354 retention times are adapted from Figures 1-4; PLA<sub>2</sub> = phospholipase A<sub>2</sub>; SVMP = Snake Venom  
 355 Metalloproteinase; CTL = C-Type Lectin).

356

| Species             | Peak retention time (min) | Mascot results matching the exact mass | Exact mass from MS data | Exact mass from Mascot data | Toxin class      | Activity      | Dose required for full inhibition |
|---------------------|---------------------------|----------------------------------------|-------------------------|-----------------------------|------------------|---------------|-----------------------------------|
| <i>E. carinatus</i> | 19.1-19.9                 | PA2A1_E<br>CHCA                        | -                       | 16310                       | PLA <sub>2</sub> | Anticoagulant | 20 µM varespladib                 |
|                     | 19.9-23.1                 | -                                      | -                       | -                           | -                | Procoagulant  | 0.8 µM marimastat                 |
| <i>E. ocellatus</i> | 23.4-24.4                 | PA2A5_E<br>CHOC                        | 13856.138               | 13856                       | PLA <sub>2</sub> | Anticoagulant | 4 µM varespladib                  |
|                     | 25.1-27.1                 | VM3E2_<br>ECHOC                        | -                       | 69426                       | SVMP             | Procoagulant  | 0.16 µM marimastat/<br>20 µM DMPS |
|                     | 25.1-27.1                 | VM3E6_<br>ECHOC                        | -                       | 57658                       | SVMP             | Procoagulant  | 0.16 µM marimastat/<br>20 µM DMPS |
|                     | 25.1-27.1                 | SL1_EC<br>HOC                          | -                       | 16601                       | CTL              | Procoagulant  | 0.16 µM marimastat/<br>20 µM DMPS |
|                     | 25.1-27.1                 | SL124_E<br>CHOC                        | -                       | 16882                       | CTL              | Procoagulant  | 0.16 µM marimastat/<br>20 µM DMPS |
| <i>D. russelii</i>  | 18.6-21.5                 | PA2B8_<br>DABRR                        | 13587.225               | 13587                       | PLA <sub>2</sub> | Anticoagulant | 20 µM varespladib                 |
|                     | 18.6-21.5                 | PA2B5_<br>DABRR                        | -                       | 13587                       | PLA <sub>2</sub> | Anticoagulant | 20 µM varespladib                 |
|                     | 18.6-21.5                 | PA2B3_<br>DABRR                        | -                       | 13687                       | PLA <sub>2</sub> | Anticoagulant | 20 µM varespladib                 |

|                       |           |               |   |       |     |               |                            |
|-----------------------|-----------|---------------|---|-------|-----|---------------|----------------------------|
|                       | 21.5-22.8 | -             | - | -     | -   | Procoagulant  | 4 $\mu$ M<br>marimastat    |
| B.<br><i>arictans</i> | 16.7-17.1 | SLA_BIT<br>AR | - | 14935 | CTL | Anticoagulant | 0.8 $\mu$ M<br>varespladib |
|                       | 16.7-17.1 | SLB_BIT<br>AR | - | 14798 | CTL | Anticoagulant | 0.8 $\mu$ M<br>varespladib |

357

#### 358 4. Discussion

359 The results of this study show that the chosen four small molecule inhibitors (i.e. varespladib,  
360 marimastat, dimercaprol and DMPS) are capable of inhibiting, albeit to different extents and  
361 specificities, the coagulopathic activities of individual toxins present in *Viperinae* venoms. While this  
362 is consistent with previous work on small molecule inhibitors and chelators exhibiting  
363 anti-hemorrhagic and anti-procoagulant activities of snake venoms [9,20,23,41,42,56], here we have  
364 detailed the relative specificities of these molecules. Our findings reveal that not only is varespladib  
365 effective against the activity of anti-coagulant PLA<sub>2</sub> toxins, but also shows some inhibitory activity  
366 against procoagulant venom toxins. Contrastingly, of the SVMP-inhibitors tested, we demonstrate  
367 that their specificities are restricted to effects on procoagulant venoms toxins, and that the  
368 peptidomimetic hydroxamate inhibitor marimastat outperforms the metal chelators DMPS and  
369 dimercaprol in terms of potency.

370 There is an urgent need for stable, economical and effective snakebite treatments that can be  
371 administered in the field and in rural areas where medical access is limited. Small molecule  
372 inhibitors that specifically target a number of key classes of snake venom toxins have recently gained  
373 interest as candidates for therapeutic alternatives to antivenom, either as solo therapies or in  
374 toxin-specific inhibitor combinations, or as adjunctive treatment in combination with conventional  
375 antivenoms [18]. These compounds show great promise for the long-term development of  
376 affordable, broad-spectrum, first-aid and clinical treatment of tropical snakebite for a variety of  
377 reasons. The advantages of repurposing licensed medicines (e.g. DMPS, dimercaprol) or at least  
378 phase II-approved drug candidates (e.g. marimastat, varespladib) for snakebite is that these  
379 molecules have demonstrated safety profiles, and thus development could be significantly  
380 shortened as these agents have extensive pharmacokinetic, bioavailability and tolerance data  
381 already associated with them [23,57,58]. The small size of these compounds, compared with  
382 conventional antibodies, confer desirable drug-favourable properties enabling rapid and effective  
383 tissue penetration and, depending on the pharmacokinetics and physicochemical properties of  
384 specific inhibitors, often make them amenable for oral delivery [57,59,60]. Indeed, both varespladib  
385 and DMPS have already been demonstrated to confer preclinical efficacy against snakebite via the  
386 oral route [20,59,60]. Also, because these inhibitors can be produced in large amounts using efficient,  
387 low cost and validated synthetic procedures, they are promising candidates as more affordable  
388 treatments than conventional antivenoms for snakebite victims found in low- and middle-income  
389 countries [20,61].

390 In addition to these desirable characteristics, certain small molecule inhibitors have  
391 demonstrated broad inhibition of specific toxin families across diverse medically-important snake  
392 species [23,55] - as also evidenced here for the various coagulopathic toxins found across *Viperinae*  
393 venoms. Thus, one of the great strengths of these inhibitors lies in their ability to neutralize the  
394 activities of multiple toxin isoforms across different snake species by exploiting the similarities of the  
395 catalytic sites of action found within specific toxin families [58]. Thus, small molecule inhibitors  
396 show potential to circumvent the therapeutic challenge that venom variation presents. However,  
397 these compounds typically target only a single family of enzymatic toxins although varespladib  
398 seems capable of targeting more than one family (see Figures 1(a), 2(a), 3(a)), thus presenting a  
399 challenge for these molecules to become standalone therapeutics, as other non-inhibited toxins seem

400 likely to still cause pathology in snakebite victims. It is therefore more likely that small molecule  
401 inhibitors will need to be combined into therapeutic mixtures, either with other toxin inhibitors or  
402 monoclonal antibodies, to generate snakebite therapeutics capable of neutralizing a wide breadth of  
403 snake venoms [26,57,58]. We recently described such an approach, whereby combining the  
404 PLA<sub>2</sub>-inhibitor varespladib and the SVMP-inhibitor marimastat resulted in a therapeutic  
405 combination capable of preclinically neutralizing lethality caused by the venom of diverse  
406 haemotoxic viper species from Africa, south Asia and central America [55]. Our findings in this  
407 study provide complementary data supporting the future translation of this therapeutic mixture,  
408 since we find here that varespladib effectively inhibits anticoagulant venom toxins, while  
409 marimastat potently inhibits procoagulant venom toxins (Figures 1(b), 2(b), 3(b)). On the other hand,  
410 small molecule inhibitors could serve as valuable prehospital snakebite treatments to delay the onset  
411 of severe envenoming before the arrival of victims to secondary or tertiary healthcare facilities to  
412 receive subsequent therapy (i.e. conventional antivenoms). Indeed, compounds such as varespladib  
413 and DMPS are already being explored in this regard [20,59,60], as they represent promising  
414 candidates to be used as bridging therapies for delaying the major effects of envenomation, and  
415 reducing the long time it typically takes rural, isolated, impoverished snakebite victims to receive  
416 any form of treatment. This is important, because treatment delays are known to have major  
417 detrimental impacts on patient outcomes following snakebite [62,63].

## 418 5. Conclusions

419 In this study, a recently developed HTS coagulation assay was combined with LC fractionation  
420 and parallel obtained MS and proteomics data to assess the neutralizing potency of several small  
421 molecule inhibitors and chelators (i.e. varespladib, marimastat, dimercaprol and DMPS) against the  
422 coagulopathic activities of individual toxins found in the venoms of *Viperinae* snakes. Both  
423 procoagulant and anticoagulant activities were detected in *E. carinatus*, *E. ocellatus* and *D. russelii*  
424 venoms, while only anticoagulant activity was present in *B. arietans* venoms (at 1.0 mg/ml venom  
425 injected). The PLA<sub>2</sub>-inhibitor varespladib potently inhibited the anticoagulant activities detected in  
426 all venoms, except for *D. russelii*, for which almost complete inhibition was observed. In addition,  
427 and surprisingly, varespladib showed some degree of inhibition against procoagulant venom  
428 activities across the various venoms, despite these activities not being mediated by PLA<sub>2</sub> toxins.  
429 Marimastat potently inhibited procoagulant activities across the venoms tested, but was  
430 unsurprisingly ineffective against anticoagulant venom activities. These findings are consistent with  
431 the anticipated mechanism of action underlying the inhibitory activity of marimastat - specifically  
432 binding to the active site of, often procoagulant, snake venom metalloproteinases. Marimastat  
433 outperformed dimercaprol and DMPS in the inhibition of procoagulant venom activities, as only  
434 moderate inhibition was observed with these metal chelators and no inhibition was found at all for  
435 DMPS on *D. russelii* venom. It is, however, possible that the presence of other metal ions in our  
436 bioassay (i.e. calcium) may be partly responsible for these reduced inhibitory activities compared  
437 with marimastat. Neither DMPS nor dimercaprol inhibited the non-SVMP stimulated anticoagulant  
438 venom activities observed across the venoms. Our data further strengthens recent findings  
439 suggesting that small molecule inhibitors such as varespladib and marimastat may have broad,  
440 cross-species, neutralizing capabilities that make them highly amenable for translation into new  
441 'generic' snakebite therapeutics. Given our evidence that both inhibitors have different specificities,  
442 our findings further support the concept that a therapeutic combination consisting of both of these  
443 Phase II-approved small molecule toxin inhibitors shows great potential as a new broad-spectrum  
444 snakebite treatment.

445 **Supplementary Materials:** The supporting information related to this article can be found in "*Supplementary*  
446 *Materials: Neutralizing effects of small molecule inhibitors and metal chelators on coagulopathic Viperinae snake venom*  
447 *toxins*". The following are available online at [www.mdpi.com/xxx/s1](http://www.mdpi.com/xxx/s1), Figure S1: Duplicate bioassay  
448 chromatograms of nanofractionated *E. carinatus* venom in the presence of different concentrations of  
449 varespladib; Figure S2: Duplicate bioassay chromatograms of nanofractionated *E. carinatus* venom in the  
450 presence of different concentrations of marimastat; Figure S3: Duplicate bioassay chromatograms of

451 nanofractionated *E. carinatus* venom in the presence of different concentrations of dimercaprol; Figure S4:  
452 Duplicate bioassay chromatograms of nanofractionated *E. carinatus* venom in the presence of different  
453 concentrations of DMPS; Figure S5: Duplicate bioassay chromatograms of nanofractionated *E. ocellatus* venom  
454 in the presence of different concentrations of varespladib; Figure S6: Duplicate bioassay chromatograms of  
455 nanofractionated *E. ocellatus* venom in the presence of different concentrations of marimastat; Figure S7:  
456 Duplicate bioassay chromatograms of nanofractionated *E. ocellatus* venom in the presence of different  
457 concentrations of dimercaprol; Figure S8: Duplicate bioassay chromatograms of nanofractionated *E. ocellatus*  
458 venom in the presence of different concentrations of DMPS; Figure S9: Duplicate bioassay chromatograms of  
459 nanofractionated *D. russelii* venom in the presence of different concentrations of varespladib; Figure S10:  
460 Duplicate bioassay chromatograms of nanofractionated *D. russelii* venom in the presence of different  
461 concentrations of marimastat; Figure S11: Duplicate bioassay chromatograms of nanofractionated *D. russelii*  
462 venom in the presence of different concentrations of dimercaprol; Figure S12: Duplicate bioassay  
463 chromatograms of nanofractionated *D. russelii* venom in the presence of different concentrations of DMPS;  
464 Figure S13: Duplicate bioassay chromatograms of nanofractionated *B. arietans* venom in the presence of  
465 different concentrations of varespladib; Figure S14: Duplicate bioassay chromatograms of nanofractionated *B.*  
466 *arietans* venom in the presence of different concentrations of marimastat.

467 **Conflicts of Interest:** The authors declare no conflict of interest.

## 468 References

- 469 1. Gutiérrez, J.M.; Calvete, J.J.; Habib, A.G.; Harrison, R.A.; Williams, D.J.; Warrell, D.A. Snakebite  
470 envenoming. *Nature Reviews Disease Primers* **2017**, *3*, 1-21.
- 471 2. Rogalski, A.; Soerensen, C.; Op den Brouw, B.; Lister, C.; Dashevsky, D.; Arbuckle, K.; Gloria, A.;  
472 Zdenek, C.N.; Casewell, N.R.; Gutiérrez, J.M. Differential procoagulant effects of saw-scaled viper  
473 (Serpentes: Viperidae: *Echis*) snake venoms on human plasma and the narrow taxonomic ranges of  
474 antivenom efficacies. *Toxicology letters* **2017**, *280*, 159-170.
- 475 3. Gutiérrez, J.M.; Theakston, R.D.G.; Warrell, D.A. Confronting the neglected problem of snake bite  
476 envenoming: the need for a global partnership. *PLoS medicine* **2006**, *3*, e150.
- 477 4. Calvete, J.J.; Sanz, L.; Angulo, Y.; Lomonte, B.; Gutiérrez, J.M. Venoms, venomics, antivenomics. *FEBS*  
478 *letters* **2009**, *583*, 1736-1743.
- 479 5. Lu, Q.; Clemetson, J.; Clemetson, K.J. Snake venoms and hemostasis. *Journal of Thrombosis and*  
480 *Haemostasis* **2005**, *3*, 1791-1799.
- 481 6. Moura-da-Silva, A.; Butera, D.; Tanjoni, I. Importance of snake venom metalloproteinases in cell  
482 biology: effects on platelets, inflammatory and endothelial cells. *Current Pharmaceutical Design* **2007**, *13*,  
483 2893-2905.
- 484 7. Sant'Ana Malaque, C.M.; Gutiérrez, J.M. Snakebite Envenomation in Central and South America.  
485 *Critical Care Toxicology* **2016**, 1-22.
- 486 8. Maduwage, K.; Isbister, G.K. Current treatment for venom-induced consumption coagulopathy  
487 resulting from snakebite. *PLoS neglected tropical diseases* **2014**, *8*, e3220.
- 488 9. Ainsworth, S.; Slagboom, J.; Alomran, N.; Pla, D.; Alhamdi, Y.; King, S.I.; Bolton, F.M.; Gutiérrez, J.M.;  
489 Vonk, F.J.; Toh, C.-H. The paraspecific neutralisation of snake venom induced coagulopathy by  
490 antivenoms. *Communications biology* **2018**, *1*, 1-14.
- 491 10. Slagboom, J.; Kool, J.; Harrison, R.A.; Casewell, N.R. Haemotoxic snake venoms: their functional  
492 activity, impact on snakebite victims and pharmaceutical promise. *British journal of haematology* **2017**,  
493 *177*, 947-959.
- 494 11. Kang, T.S.; Georgieva, D.; Genov, N.; Murakami, M.T.; Sinha, M.; Kumar, R.P.; Kaur, P.; Kumar, S.;  
495 Dey, S.; Sharma, S. Enzymatic toxins from snake venom: structural characterization and mechanism of  
496 catalysis. *The FEBS journal* **2011**, *278*, 4544-4576.

- 497 12. Kini, R.M. Excitement ahead: structure, function and mechanism of snake venom phospholipase A<sub>2</sub>  
498 enzymes. *Toxicon* **2003**, *42*, 827-840.
- 499 13. Matsui, T.; Fujimura, Y.; Titani, K. Snake venom proteases affecting hemostasis and thrombosis.  
500 *Biochimica et biophysica acta* **2000**, *1477*, 146-156.
- 501 14. Serrano, S.M.; Maroun, R.C. Snake venom serine proteinases: sequence homology *vs.* substrate  
502 specificity, a paradox to be solved. *Toxicon* **2005**, *45*, 1115-1132.
- 503 15. Alvarez-Flores, M.; Faria, F.; de Andrade, S.; Chudzinski-Tavassi, A. Snake venom components  
504 affecting the coagulation system. *Snake Venoms* **2017**, 417-436.
- 505 16. Ramos, O.; Selistre-de-Araujo, H. Snake venom metalloproteases—structure and function of catalytic  
506 and disintegrin domains. *Comparative Biochemistry and Physiology Part C: Toxicology & Pharmacology*  
507 **2006**, *142*, 328-346.
- 508 17. Williams, H.F.; Layfield, H.J.; Vallance, T.; Patel, K.; Bicknell, A.B.; Trim, S.A.; Vaiyapuri, S. The urgent  
509 need to develop novel strategies for the diagnosis and treatment of snakebites. *Toxins* **2019**, *11*, 363.
- 510 18. Bulfone, T.C.; Samuel, S.P.; Bickler, P.E.; Lewin, M.R. Developing small molecule therapeutics for the  
511 initial and adjunctive treatment of snakebite. *Journal of tropical medicine* **2018**, 1-10.
- 512 19. Resiere, D.; Gutiérrez, J.M.; Névière, R.; Cabié, A.; Hossein, M.; Kallel, H. Antibiotic therapy for  
513 snakebite envenoming. *Journal of Venomous Animals and Toxins including Tropical Diseases* **2020**, *26*, 1-2.
- 514 20. Albulescu, L.-O.; Hale, M.S.; Ainsworth, S.; Alsolaiss, J.; Crittenden, E.; Calvete, J.J.; Evans, C.;  
515 Wilkinson, M.C.; Harrison, R.A.; Kool, J. Preclinical validation of a repurposed metal chelator as an  
516 early-intervention therapeutic for hemotoxic snakebite. *Science Translational Medicine* **2020**, *12*,  
517 eaay8314.
- 518 21. Abraham, E.; Naum, C.; Bandi, V.; Gervich, D.; Lowry, S.F.; Wunderink, R.; Schein, R.M.; Macias, W.;  
519 Skerjanec, S.; Dmitrienko, A. Efficacy and safety of LY315920Na/S-5920, a selective inhibitor of 14-kDa  
520 group IIA secretory phospholipase A<sub>2</sub>, in patients with suspected sepsis and organ failure. *Critical care*  
521 *medicine* **2003**, *31*, 718-728.
- 522 22. Nicholls, S.J.; Kastelein, J.J.; Schwartz, G.G.; Bash, D.; Rosenson, R.S.; Cavender, M.A.; Brennan, D.M.;  
523 Koenig, W.; Jukema, J.W.; Nambi, V. Varespladib and cardiovascular events in patients with an acute  
524 coronary syndrome: the VISTA-16 randomized clinical trial. *Jama* **2014**, *311*, 252-262.
- 525 23. Lewin, M.; Samuel, S.; Merkel, J.; Bickler, P. Varespladib (LY315920) appears to be a potent,  
526 broad-spectrum, inhibitor of snake venom phospholipase A<sub>2</sub> and a possible pre-referral treatment for  
527 envenomation. *Toxins* **2016**, *8*, 248-263.
- 528 24. Gutiérrez, J.M.; Lewin, M.R.; Williams, D.; Lomonte, B. Varespladib (LY315920) and Methyl  
529 Varespladib (LY333013) Abrogate or Delay Lethality Induced by Presynaptically Acting Neurotoxic  
530 Snake Venoms. *Toxins* **2020**, *12*, 131.
- 531 25. Bryan-Quirós, W.; Fernández, J.; Gutiérrez, J.M.; Lewin, M.R.; Lomonte, B. Neutralizing properties of  
532 LY315920 toward snake venom group I and II myotoxic phospholipases A<sub>2</sub>. *Toxicon* **2019**, *157*, 1-7.
- 533 26. Bittenbinder, M.A.; Zdenek, C.N.; Op den Brouw, B.; Youngman, N.J.; Dobson, J.S.; Naude, A.; Vonk,  
534 F.J.; Fry, B.G. Coagulotoxic cobras: Clinical implications of strong anticoagulant actions of African  
535 spitting *Naja* venoms that are not neutralised by antivenom but are by LY315920 (Varespladib). *Toxins*  
536 **2018**, *10*, 516-526.
- 537 27. Underwood, C.; Min, D.; Lyons, J.; Hambley, T. The interaction of metal ions and Marimastat with  
538 matrix metalloproteinase 9. *Journal of inorganic biochemistry* **2003**, *95*, 165-170.

- 539 28. Peterson, M.; Porter, K.; Loftus, I.; Thompson, M.; London, N. Marimastat Inhibits Neointimal  
540 Thickening in a Model of Human Arterial Intimal Hyperplasia. *European Journal of Vascular and*  
541 *Endovascular Surgery* **2000**, *19*, 461-467.
- 542 29. Curran, S.; Murray, G.I. Matrix metalloproteinases in tumour invasion and metastasis. *The Journal of*  
543 *pathology* **1999**, *189*, 300-308.
- 544 30. Rasmussen, H.S.; McCann, P.P. Matrix metalloproteinase inhibition as a novel anticancer strategy: a  
545 review with special focus on batimastat and marimastat. *Pharmacology & therapeutics* **1997**, *75*, 69-75.
- 546 31. Evans, J.; Stark, A.; Johnson, C.; Daniel, F.; Carmichael, J.; Buckels, J.; Imrie, C.; Brown, P.;  
547 Neoptolemos, J. A phase II trial of marimastat in advanced pancreatic cancer. *British journal of cancer*  
548 **2001**, *85*, 1865.
- 549 32. Winer, A.; Adams, S.; Mignatti, P. Matrix metalloproteinase inhibitors in cancer therapy: turning past  
550 failures into future successes. *Molecular cancer therapeutics* **2018**, *17*, 1147-1155.
- 551 33. Rosenbaum, E.; Zahurak, M.; Sinibaldi, V.; Carducci, M.A.; Pili, R.; Laufer, M.; DeWeese, T.L.;  
552 Eisenberger, M.A. Marimastat in the treatment of patients with biochemically relapsed prostate cancer:  
553 a prospective randomized, double-blind, phase I/II trial. *Clinical cancer research* **2005**, *11*, 4437-4443.
- 554 34. King, J.; Zhao, J.; Clingan, P.; Morris, D. Randomised double blind placebo control study of adjuvant  
555 treatment with the metalloproteinase inhibitor, Marimastat in patients with inoperable colorectal  
556 hepatic metastases: significant survival advantage in patients with musculoskeletal side-effects.  
557 *Anticancer research* **2003**, *23*, 639-645.
- 558 35. Levin, V.A.; Phuphanich, S.; Yung, W.A.; Forsyth, P.A.; Del Maestro, R.; Perry, J.R.; Fuller, G.N.;  
559 Baillet, M. Randomized, double-blind, placebo-controlled trial of marimastat in glioblastoma  
560 multiforme patients following surgery and irradiation★. *Journal of neuro-oncology* **2006**, *78*, 295-302.
- 561 36. Bramhall, S.; Schulz, J.; Nemunaitis, J.; Brown, P.; Baillet, M.; Buckels, J. A double-blind  
562 placebo-controlled, randomised study comparing gemcitabine and marimastat with gemcitabine and  
563 placebo as first line therapy in patients with advanced pancreatic cancer. *British journal of cancer* **2002**,  
564 *87*, 161.
- 565 37. Howes, J.-M.; Theakston, R.D.G.; Laing, G. Neutralization of the haemorrhagic activities of viperine  
566 snake venoms and venom metalloproteinases using synthetic peptide inhibitors and chelators. *Toxicon*  
567 **2007**, *49*, 734-739.
- 568 38. Zhang, D.; Botos, I.; Gomis-Rüth, F.-X.; Doll, R.; Blood, C.; Njoroge, F.G.; Fox, J.W.; Bode, W.; Meyer,  
569 E.F. Structural interaction of natural and synthetic inhibitors with the venom metalloproteinase,  
570 atrolysin C (form d). *Proceedings of the National Academy of Sciences* **1994**, *91*, 8447-8451.
- 571 39. Nagase, H.; Woessner, J.F. Matrix metalloproteinases. *Journal of Biological chemistry* **1999**, *274*,  
572 21491-21494.
- 573 40. Rucavado, A.; Escalante, T.; Gutiérrez, J.M.a. Effect of the metalloproteinase inhibitor batimastat in the  
574 systemic toxicity induced by *Bothrops asper* snake venom: understanding the role of metalloproteinases  
575 in envenomation. *Toxicon* **2004**, *43*, 417-424.
- 576 41. Arias, A.S.; Rucavado, A.; Gutiérrez, J.M. Peptidomimetic hydroxamate metalloproteinase inhibitors  
577 abrogate local and systemic toxicity induced by *Echis ocellatus* (saw-scaled) snake venom. *Toxicon* **2017**,  
578 *132*, 40-49.
- 579 42. Layfield, H.J.; Williams, H.F.; Ravishankar, D.; Mehmi, A.; Sonavane, M.; Salim, A.; Vaiyapuri, R.;  
580 Lakshminarayanan, K.; Vallance, T.M.; Bicknell, A.B. Repurposing Cancer Drugs Batimastat and

- 581 Marimastat to Inhibit the Activity of a Group I Metalloprotease from the Venom of the Western  
582 Diamondback Rattlesnake, *Crotalus atrox*. *Toxins* **2020**, *12*, 309.
- 583 43. Organization, W.H. WHO model list of essential medicines, 20<sup>th</sup> list (March 2017, amended August  
584 2017). **2017**.
- 585 44. Tian, R.; Shi, R. Dimercaprol is An Acrolein Scavenger that Mitigates Acrolein-mediated PC-12 Cells  
586 Toxicity and Reduces Acrolein in Rat Following Spinal Cord Injury. *Journal of Neurochemistry* **2017**, *141*,  
587 708-720.
- 588 45. Verma, S.; Kumar, R.; Khadwal, A.; Singhi, S. Accidental inorganic mercury chloride poisoning in a  
589 2-year old child. *Indian Journal of Pediatrics* **2010**, *77*, 1153-1155.
- 590 46. Kathirgamanathan, K.; Angaran, P.; Lazo-Langner, A.; Gula, L.J. Cardiac conduction block at multiple  
591 levels caused by arsenic trioxide therapy. *Canadian Journal of Cardiology* **2013**, *29*, 130.e135-130.e136.
- 592 47. Yajima, Y.; Kawaguchi, M.; Yoshikawa, M.; Okubo, M.; Tsukagoshi, E.; Sato, K.; Katakura, A. The  
593 effects of 2,3-dimercapto-1-propanesulfonic acid (DMPS) and meso-2,3-dimercaptosuccinic acid  
594 (DMSA) on the nephrotoxicity in the mouse during repeated cisplatin (CDDP) treatments. *Journal of*  
595 *Pharmacological Sciences* **2017**, *134*, 108-115.
- 596 48. Aldhaheeri, S.R.; Jeelani, R.; Kohan-Ghadr, H.R.; Khan, S.N.; Mikhael, S.; Washington, C.; Morris, R.T.;  
597 Abu-Soud, H.M. Dimercapto-1-propanesulfonic acid (DMPS) induces metaphase II mouse oocyte  
598 deterioration. *Free Radic Biol Med* **2017**, *112*, 445-451.
- 599 49. Still, K.; Nandlal, R.S.; Slagboom, J.; Somsen, G.W.; Casewell, N.R.; Kool, J. Multipurpose HTS  
600 coagulation analysis: assay development and assessment of coagulopathic snake venoms. *Toxins* **2017**,  
601 *9*, 382.
- 602 50. Xie, C.; Slagboom, J.; Albuлесcu, L.-O.; Bruyneel, B.; Still, K.; Vonk, F.J.; Somsen, G.W.; Casewell, N.R.;  
603 Kool, J. Antivenom Neutralization of Coagulopathic Snake Venom Toxins Assessed by Bioactivity  
604 Profiling Using Nanofractionation Analytics. *Toxins* **2020**, *12*, 53.
- 605 51. Slagboom, J.; Mladić, M.; Xie, C.; Kazandjian, T.D.; Vonk, F.; Somsen, G.W.; Casewell, N.R.; Kool, J.  
606 High throughput screening and identification of coagulopathic snake venom proteins and peptides  
607 using nanofractionation and proteomics approaches. *PLoS Neglected Tropical Diseases* **2020**, *14*,  
608 e0007802.
- 609 52. Sharma, M.; Das, D.; Iyer, J.K.; Kini, R.M.; Doley, R. Unveiling the complexities of *Daboia russelii*  
610 venom, a medically important snake of India, by tandem mass spectrometry. *Toxicon* **2015**, *107*,  
611 266-281.
- 612 53. Hiremath, V.; Urs, A.N.; Joshi, V.; Suvilesh, K.; Savitha, M.; Amog, P.U.; Rudresha, G.; Yariswamy, M.;  
613 Vishwanath, B. Differential action of medically important Indian BIG FOUR snake venoms on rodent  
614 blood coagulation. *Toxicon* **2016**, *110*, 19-26.
- 615 54. Hiremath, V.; Yariswamy, M.; Nanjaraj Urs, A.; Joshi, V.; Suvilesh, K.; Ramakrishnan, C.; Nataraju, A.;  
616 Vishwanath, B. Differential action of Indian BIG FOUR snake venom toxins on blood coagulation.  
617 *Toxin Reviews* **2014**, *33*, 23-32.
- 618 55. Albuлесcu, L.-O.; Xie, C.; Ainsworth, S.; Alsolaiss, J.; Crittenden, E.; Dawson, C.A.; Softley, R.; Bartlett,  
619 K.E.; Harrison, R.A.; Kool, J., et al. A combination of two small molecule toxin inhibitors provides  
620 pancontinental preclinical efficacy against viper snakebite. *bioRxiv* **2020**.
- 621 56. Wang, Y.; Zhang, J.; Zhang, D.; Xiao, H.; Xiong, S.; Huang, C. Exploration of the inhibitory potential of  
622 varespladib for snakebite envenomation. *Molecules* **2018**, *23*, 391-403.



- 623 57. Kini, R.M.; Sidhu, S.S.; Laustsen, A.H. Biosynthetic oligoclonal antivenom (BOA) for snakebite and  
624 next-generation treatments for snakebite victims. *Toxins* **2018**, *10*, 534.
- 625 58. Knudsen, C.; Ledsgaard, L.; Dehli, R.I.; Ahmadi, S.; Sørensen, C.V.; Laustsen, A.H. Engineering and  
626 design considerations for next-generation snakebite antivenoms. *Toxicon* **2019**, *167*, 67-75.
- 627 59. Lewin, M.R.; Gutiérrez, J.M.; Samuel, S.P.; Herrera, M.; Bryan-Quirós, W.; Lomonte, B.; Bickler, P.E.;  
628 Bulfone, T.C.; Williams, D.J. Delayed oral LY333013 rescues mice from highly neurotoxic, lethal doses  
629 of Papuan Taipan (*Oxyuranus scutellatus*) venom. *Toxins* **2018**, *10*, 380-386.
- 630 60. Lewin, M.R.; Gilliam, L.L.; Gilliam, J.; Samuel, S.P.; Bulfone, T.C.; Bickler, P.E.; Gutiérrez, J.M. Delayed  
631 LY333013 (oral) and LY315920 (intravenous) reverse severe neurotoxicity and rescue juvenile pigs  
632 from lethal doses of *Micrurus fulvius* (Eastern Coral snake) venom. *Toxins* **2018**, *10*, 479.
- 633 61. Harrison, R.A.; Oluoch, G.O.; Ainsworth, S.; Alsolaiss, J.; Bolton, F.; Arias, A.-S.; Gutiérrez, J.-M.;  
634 Rowley, P.; Kalya, S.; Ozwara, H. Preclinical antivenom-efficacy testing reveals potentially disturbing  
635 deficiencies of snakebite treatment capability in East Africa. *PLoS neglected tropical diseases* **2017**, *11*,  
636 e0005969-e0005969.
- 637 62. Sharma, S.K.; Chappuis, F.; Jha, N.; Bovier, P.A.; Loutan, L.; Koirala, S. Impact of snake bites and  
638 determinants of fatal outcomes in southeastern Nepal. *The American journal of tropical medicine and*  
639 *hygiene* **2004**, *71*, 234-238.
- 640 63. Abubakar, S.; Habib, A.; Mathew, J. Amputation and disability following snakebite in Nigeria. *Tropical*  
641 *Doctor* **2010**, *40*, 114-116.
- 642

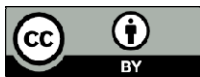

© 2020 by the authors. Submitted for possible open access publication under the terms and conditions of the Creative Commons Attribution (CC BY) license (<http://creativecommons.org/licenses/by/4.0/>).

643

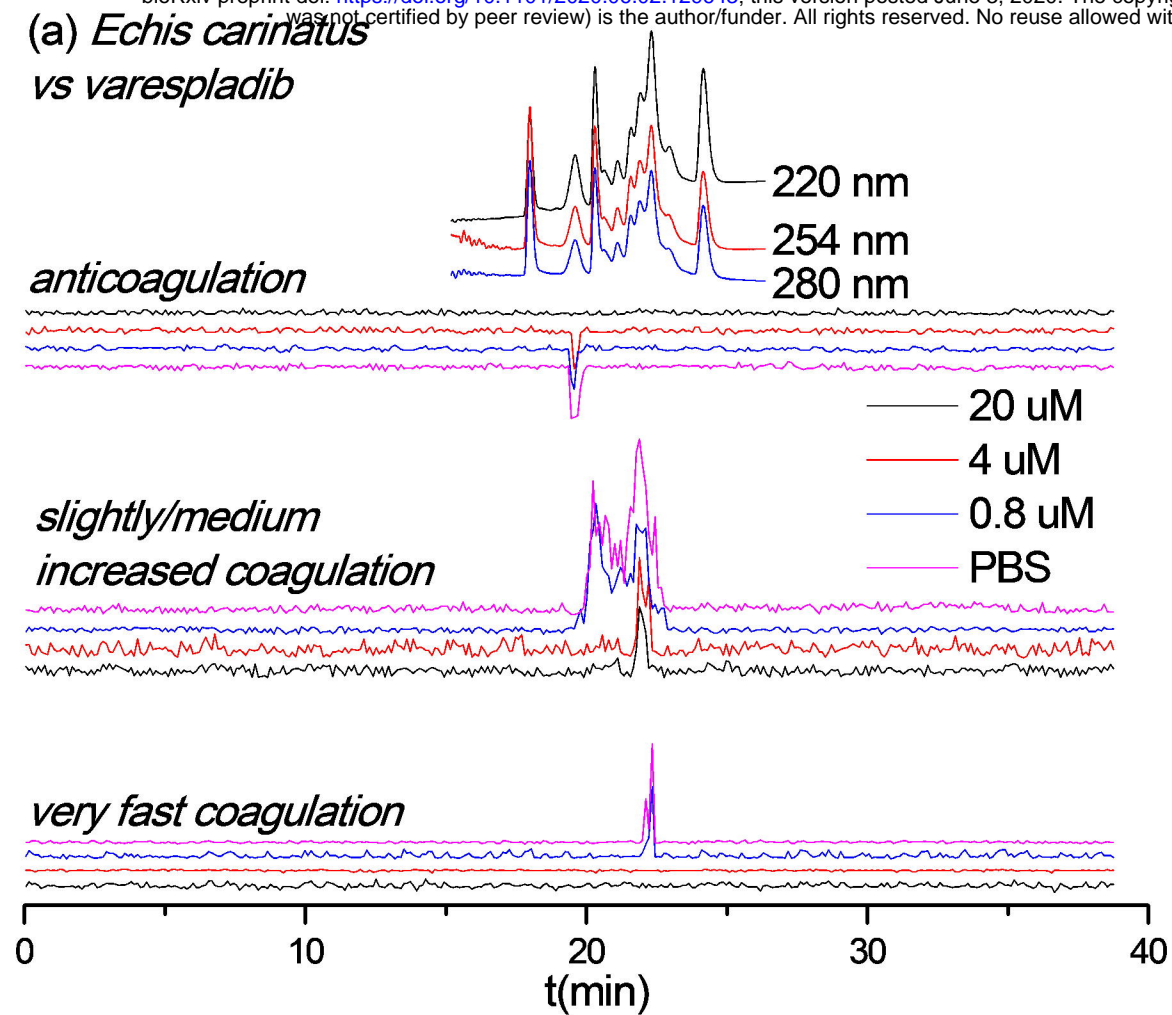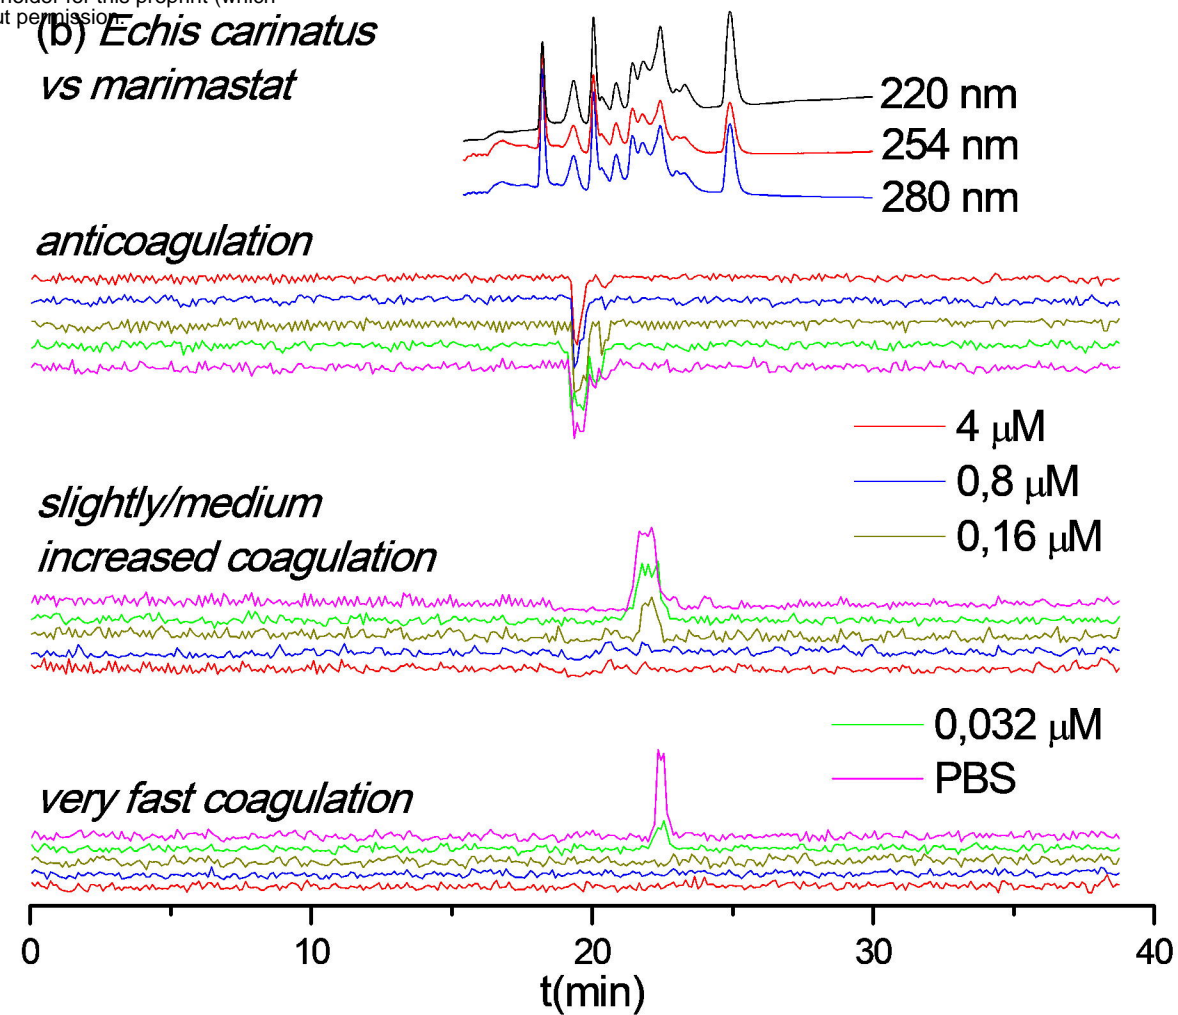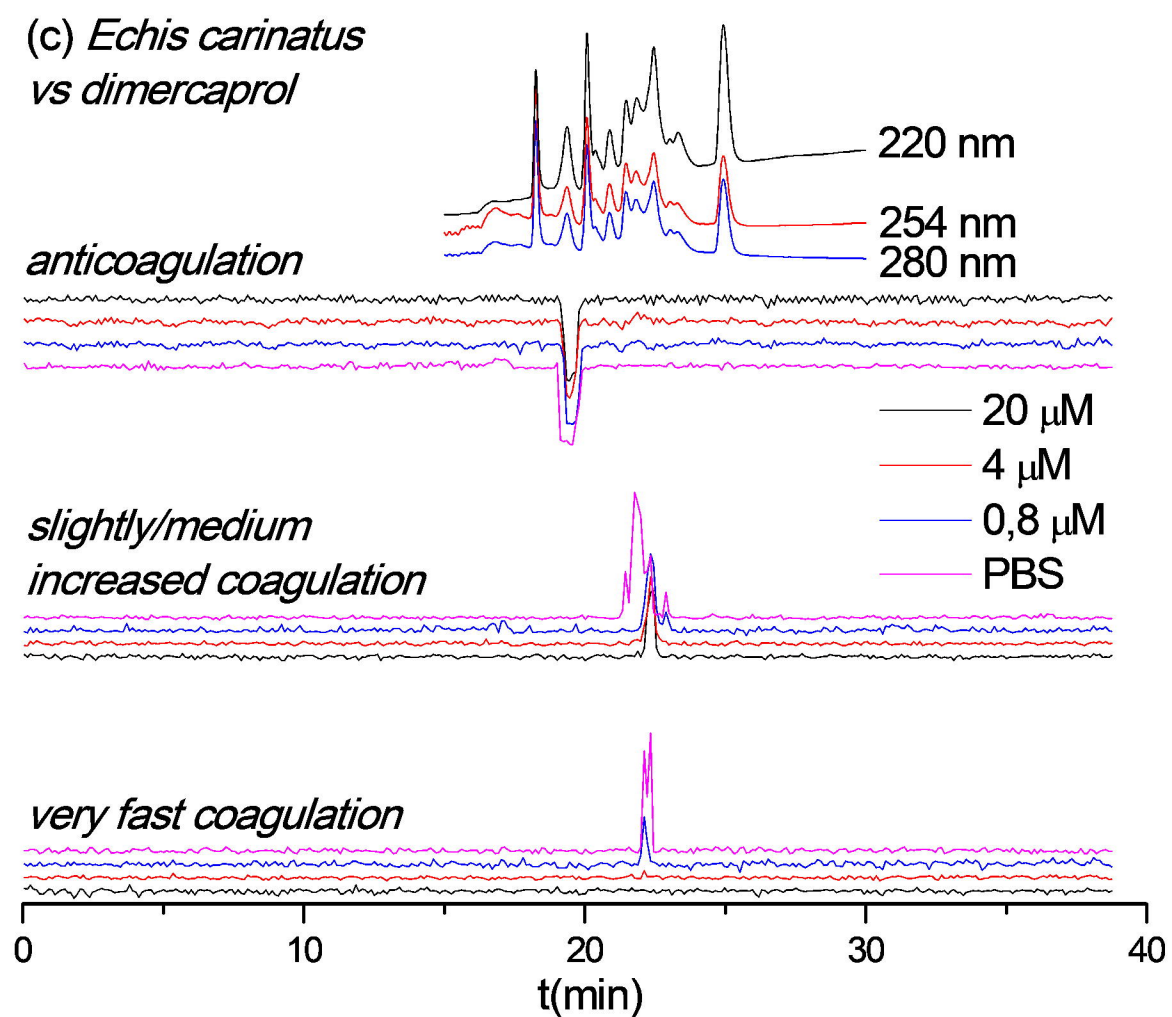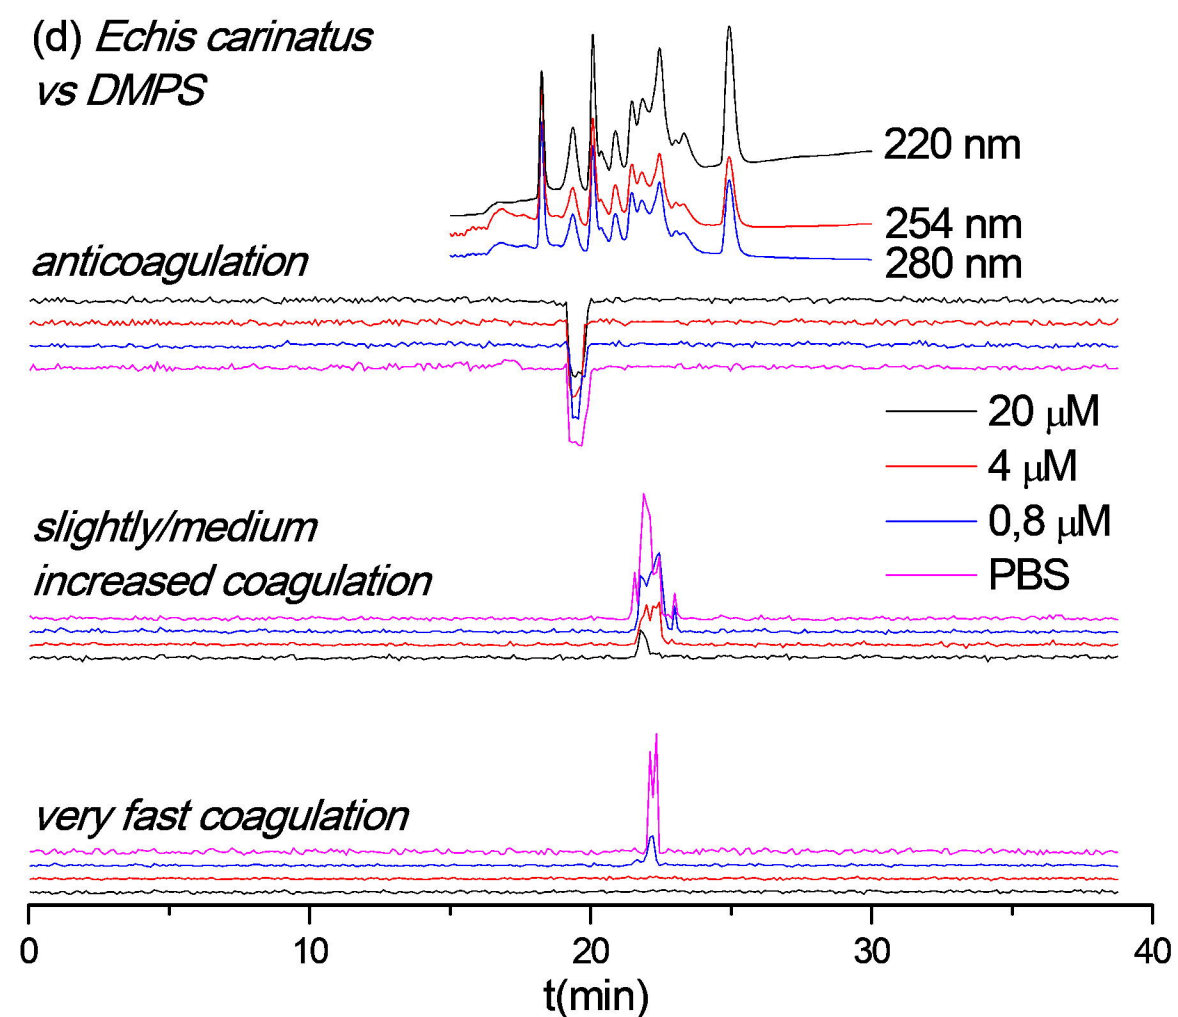

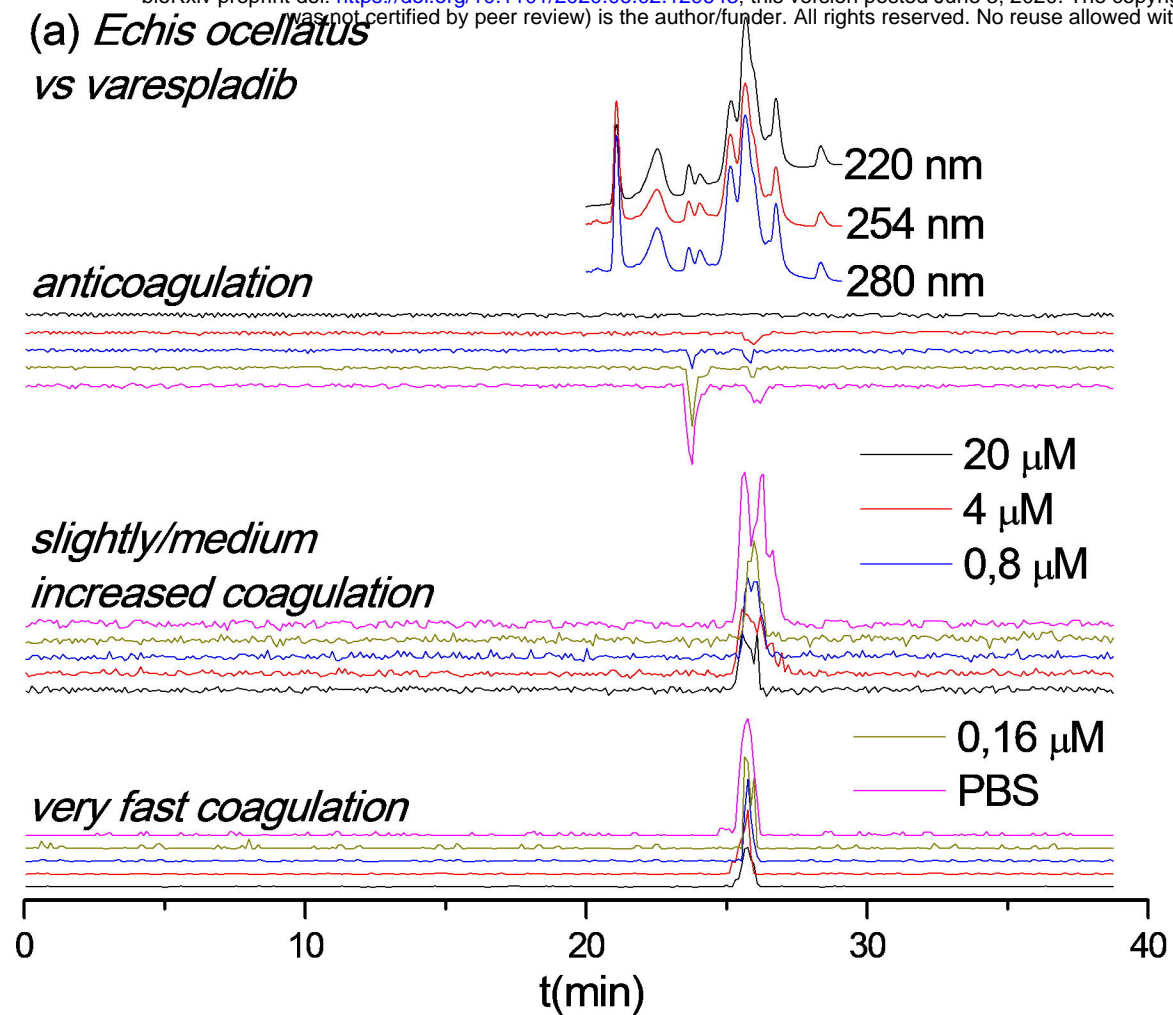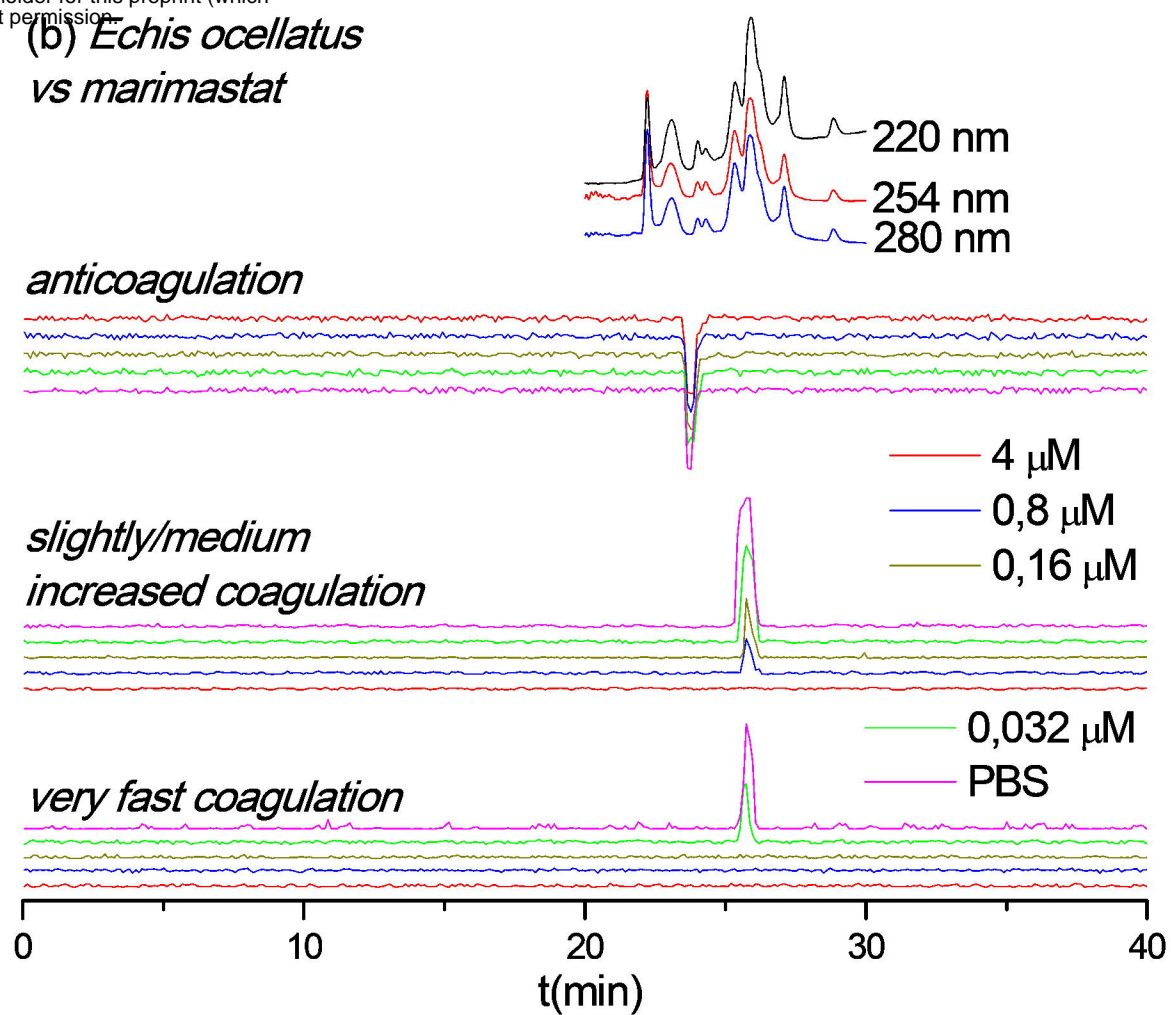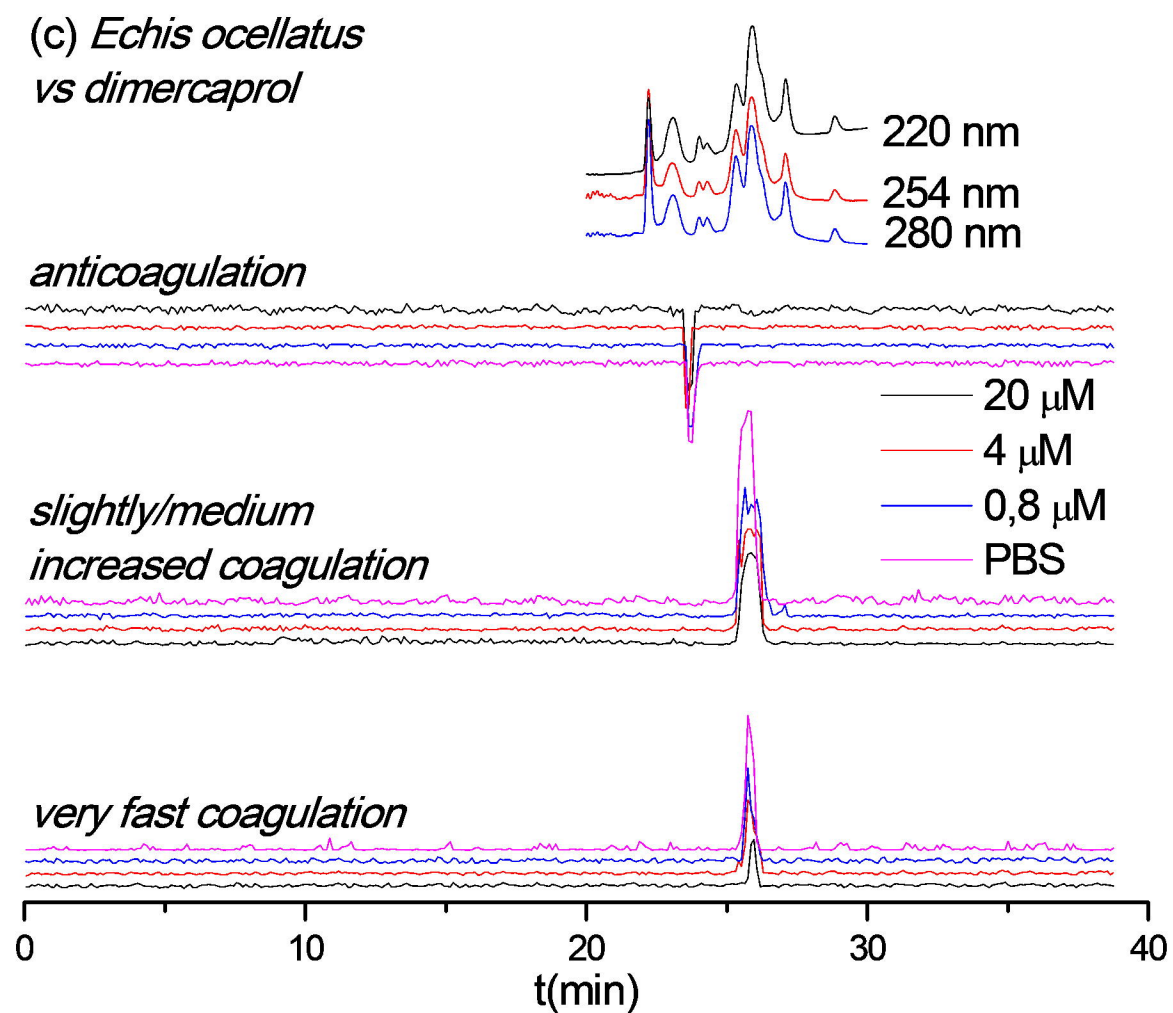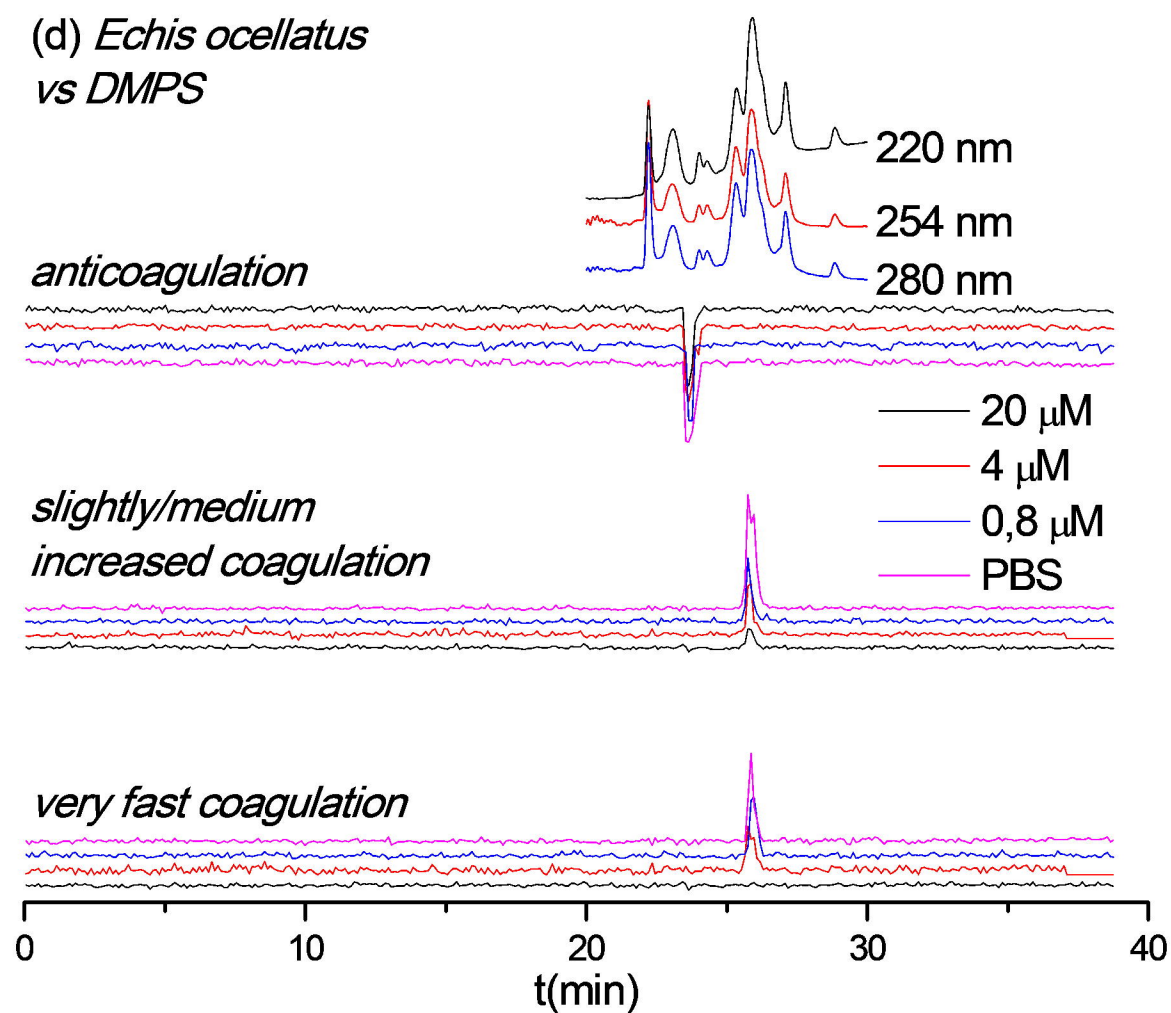

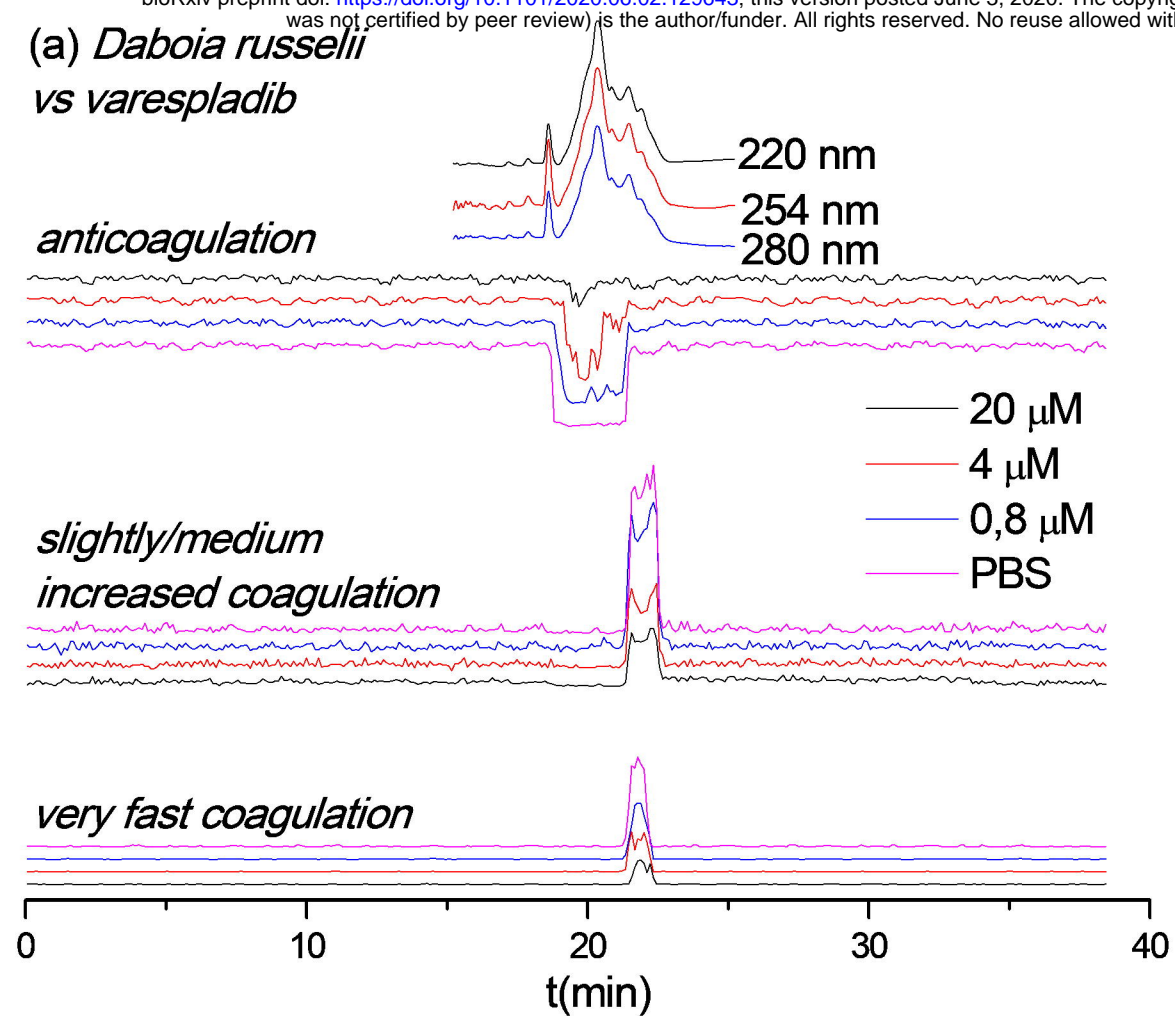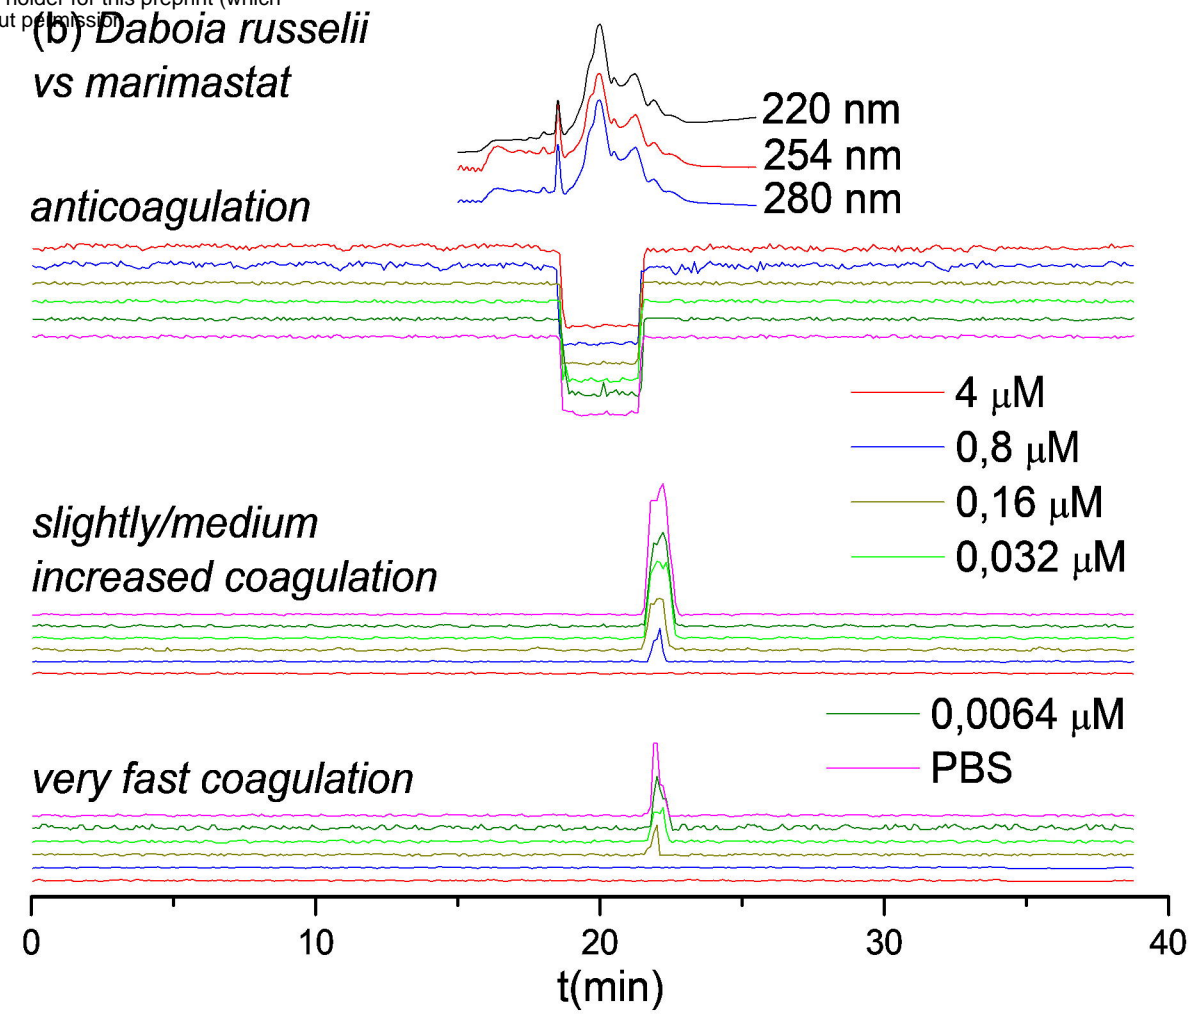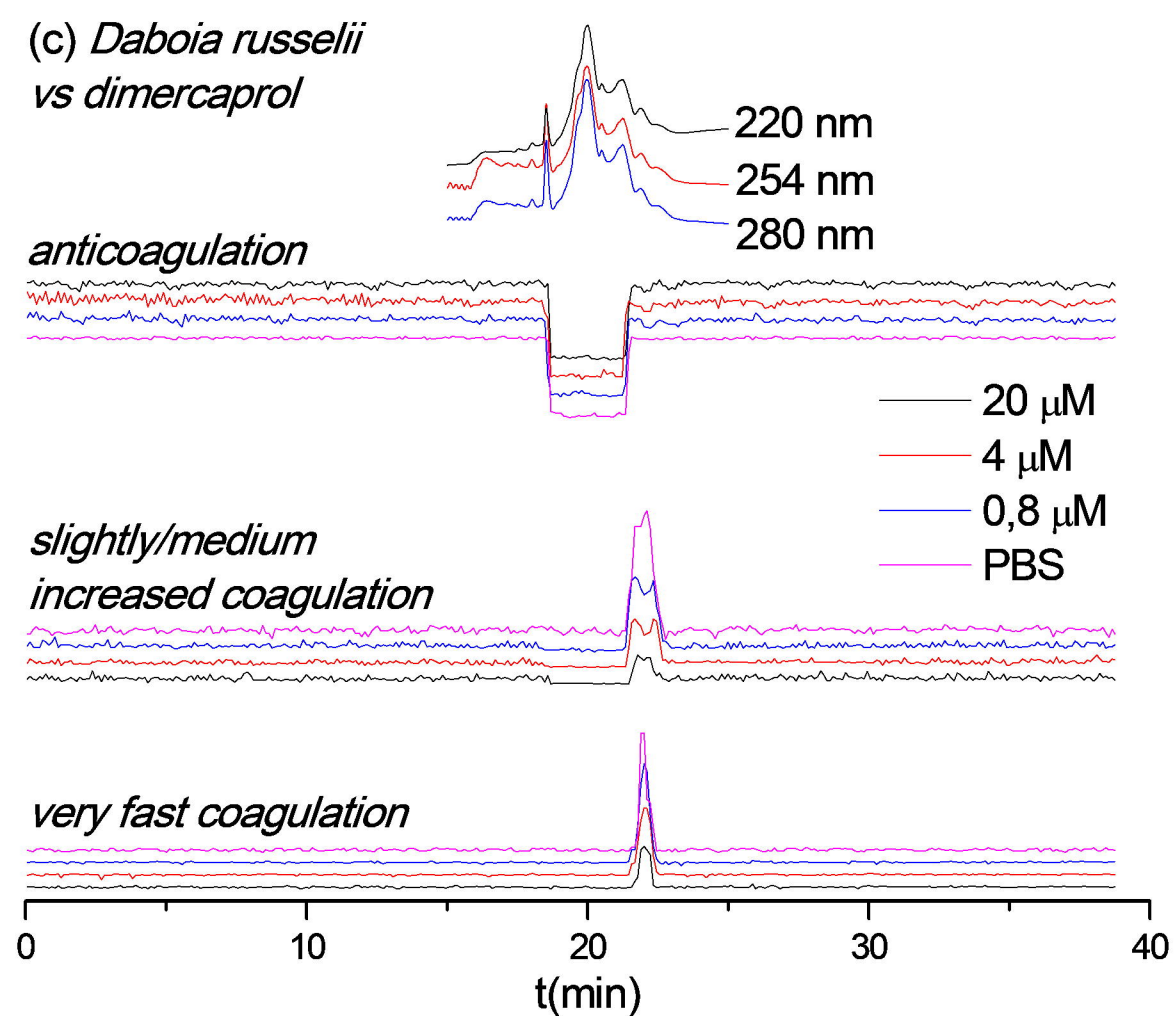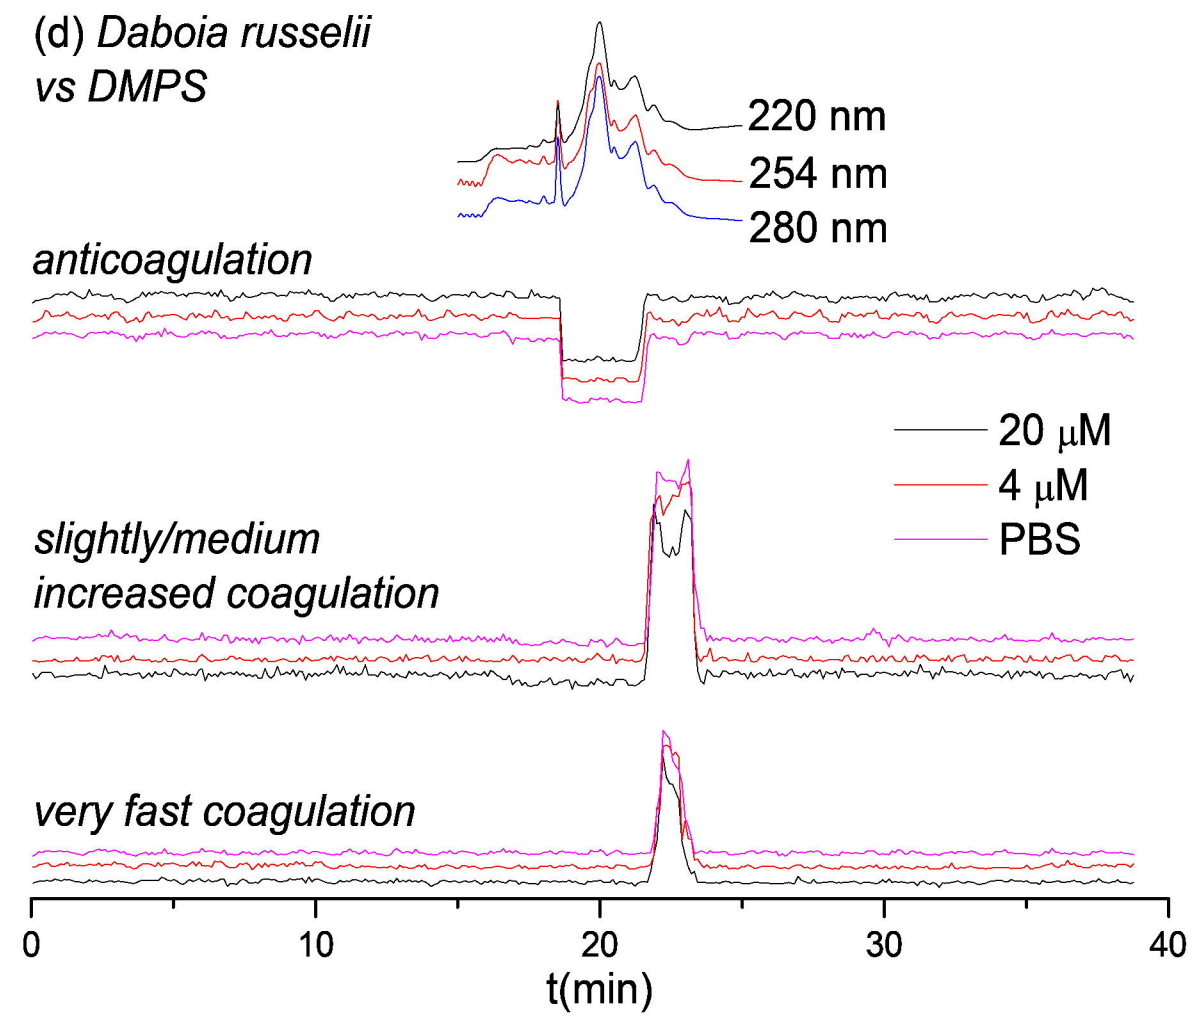

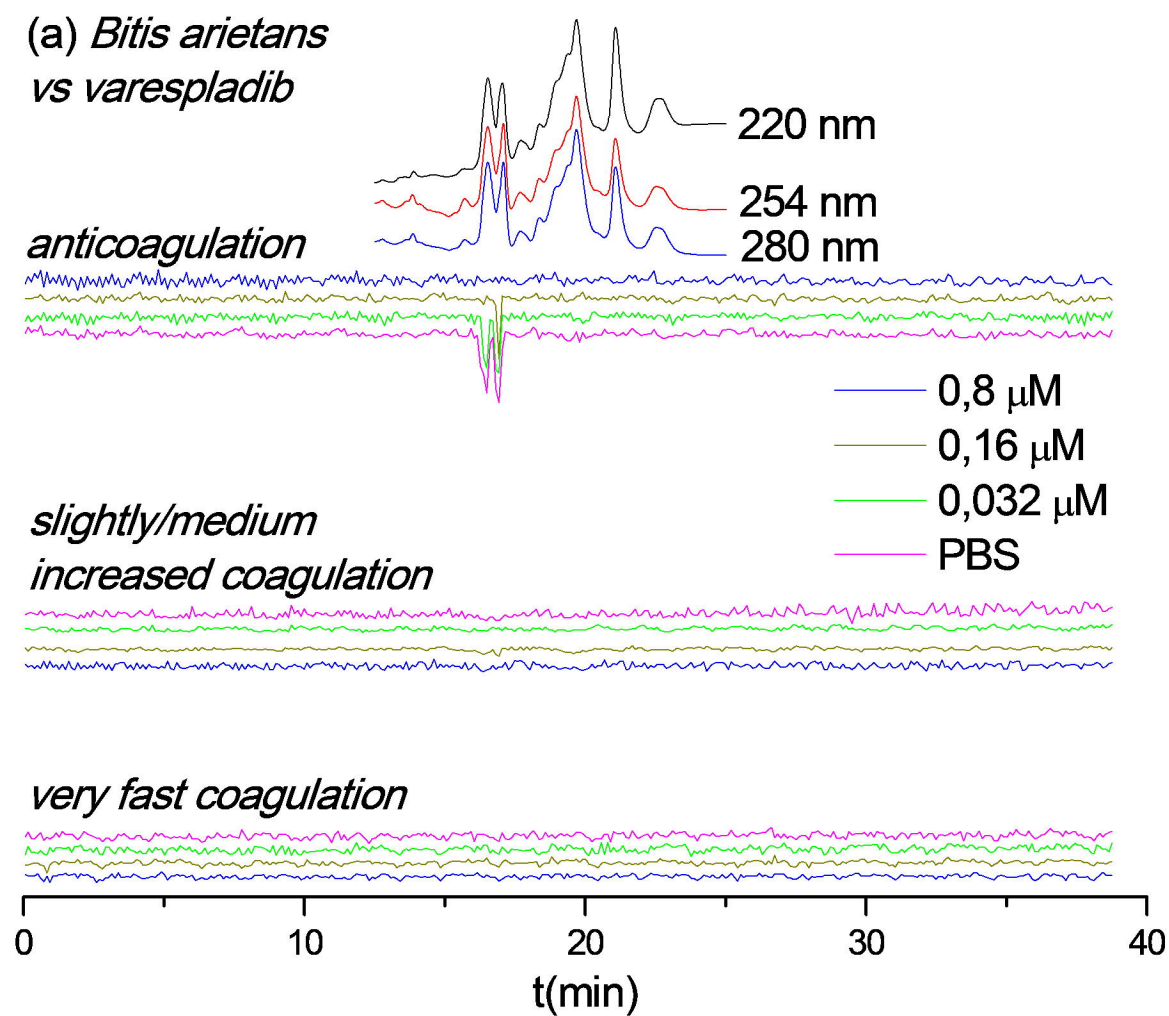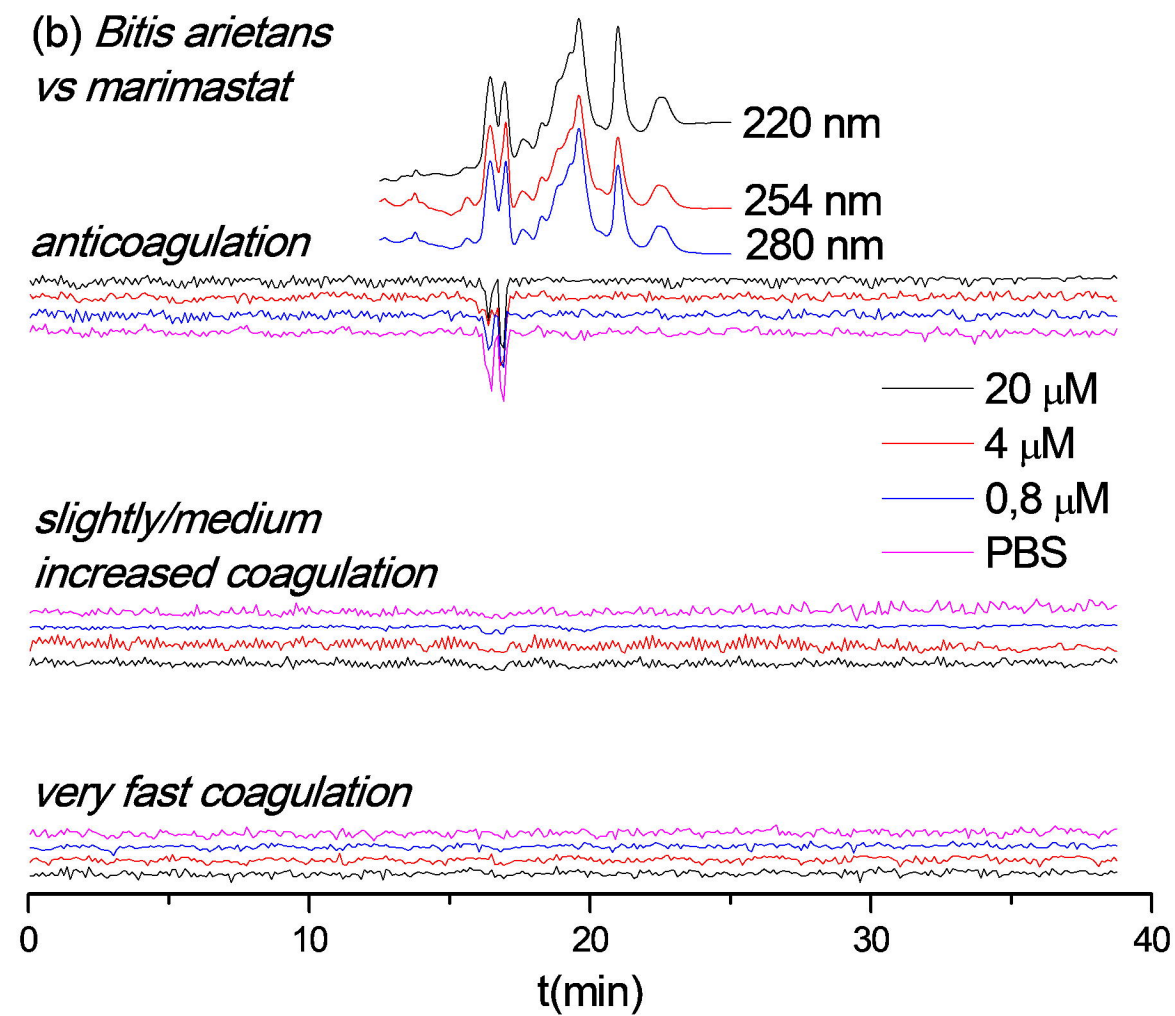

Source: https://www.biorxiv.org/content/10.1101/2020.06.02.129643v1.full.pdf
